# Supplementary material for: An immune-related prognostic signature associated with immune landscape and therapeutic responses in gastric cancer
Source: publisher site journal article supplement (doi:10.18632/aging.204534), 2023-02-22
Supplement: Supplementary file [file aging-v15i4-204534-supplementary-material-SD1.pdf]

**SUPPLEMENTARY FIGURES**

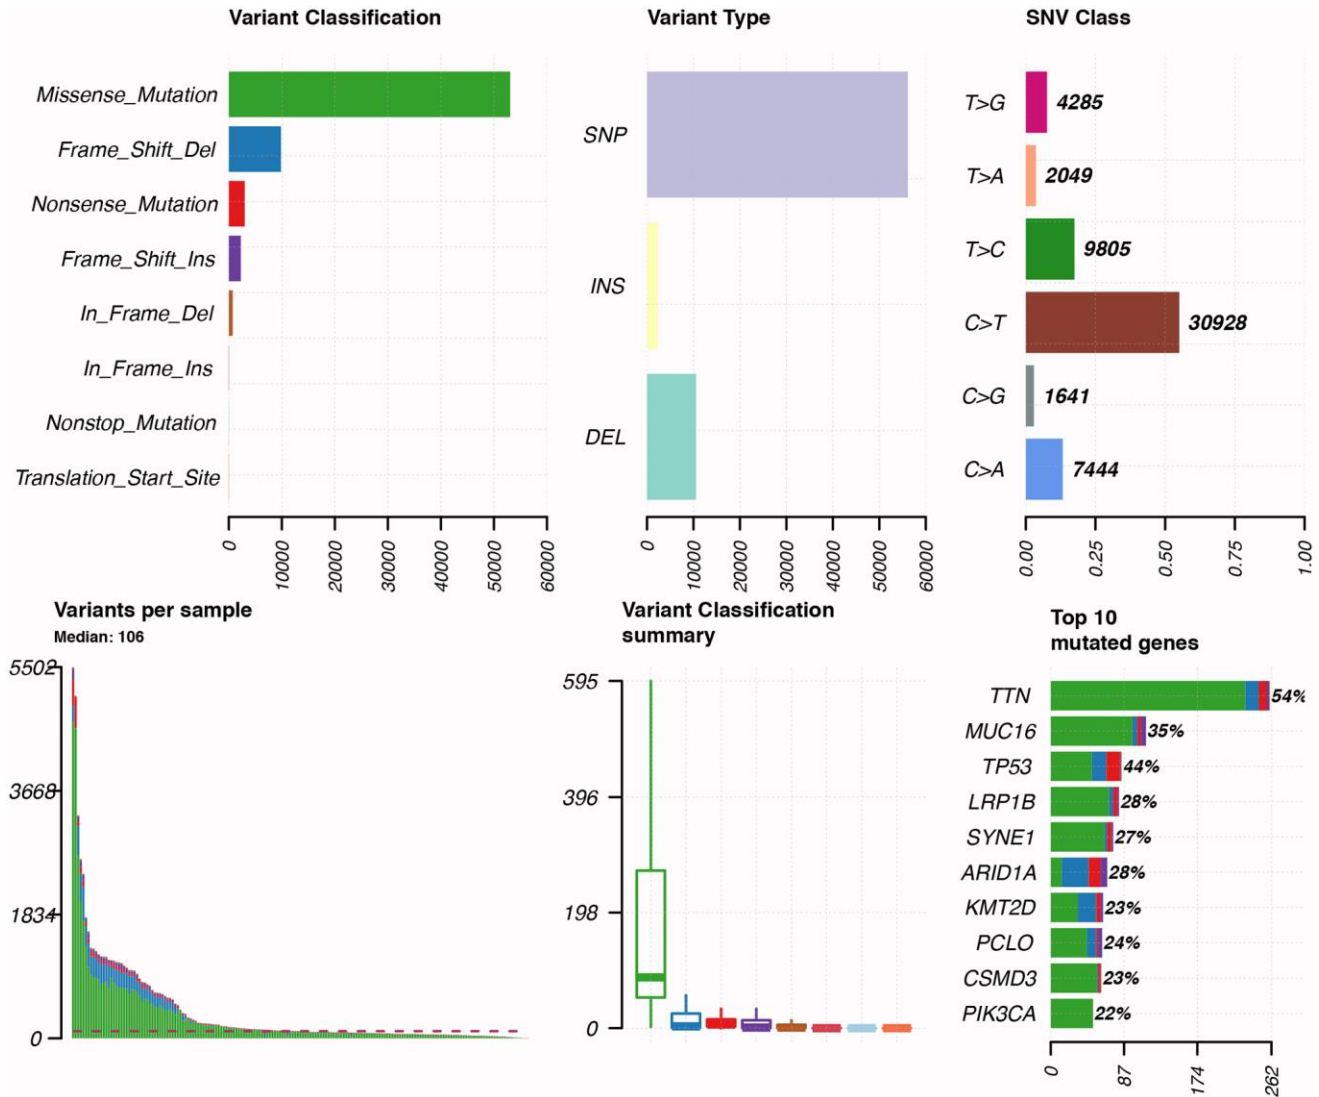

Supplementary Figure 1. Summaries of gene mutation profiles for low-risk group.

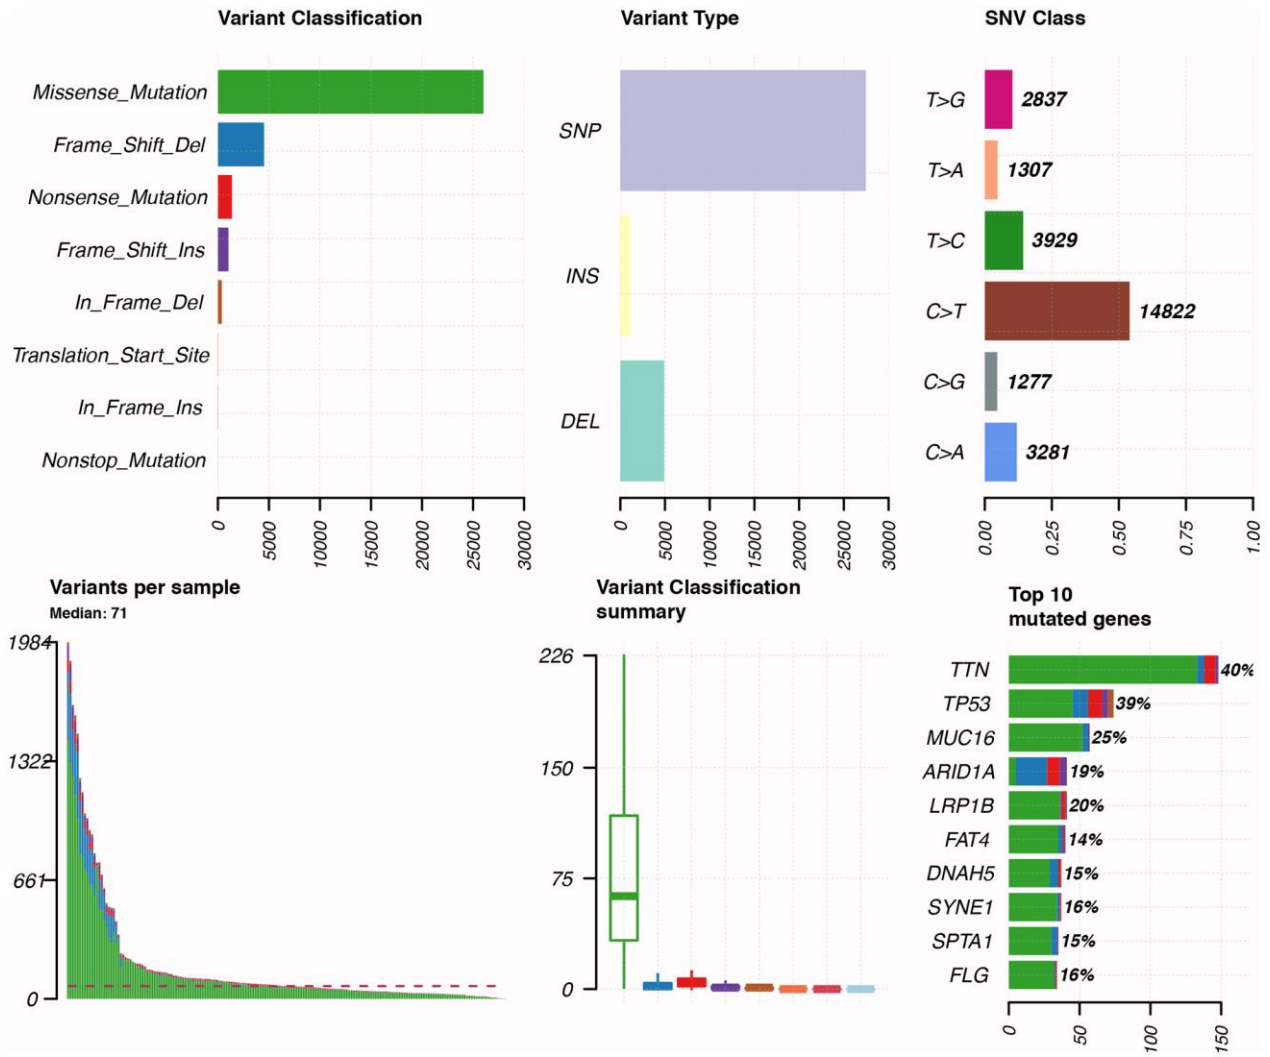

Supplementary Figure 2. Summaries of gene mutation profiles for high-risk group.

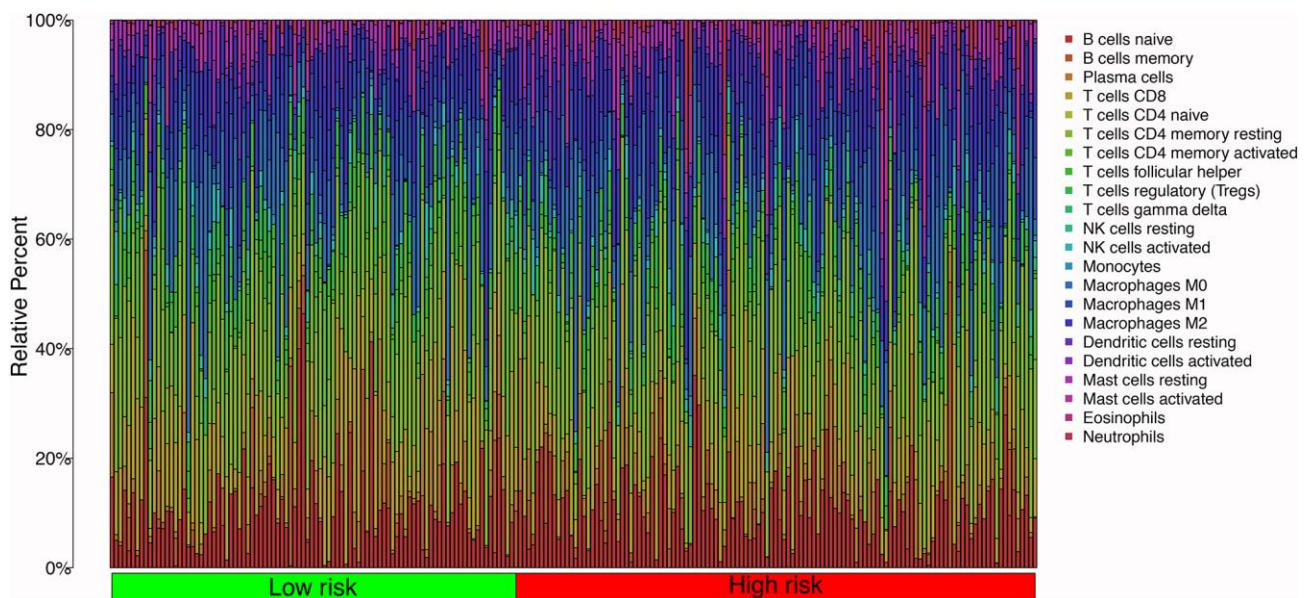

Supplementary Figure 3. The histogram of immune cells' abundance in GC samples.

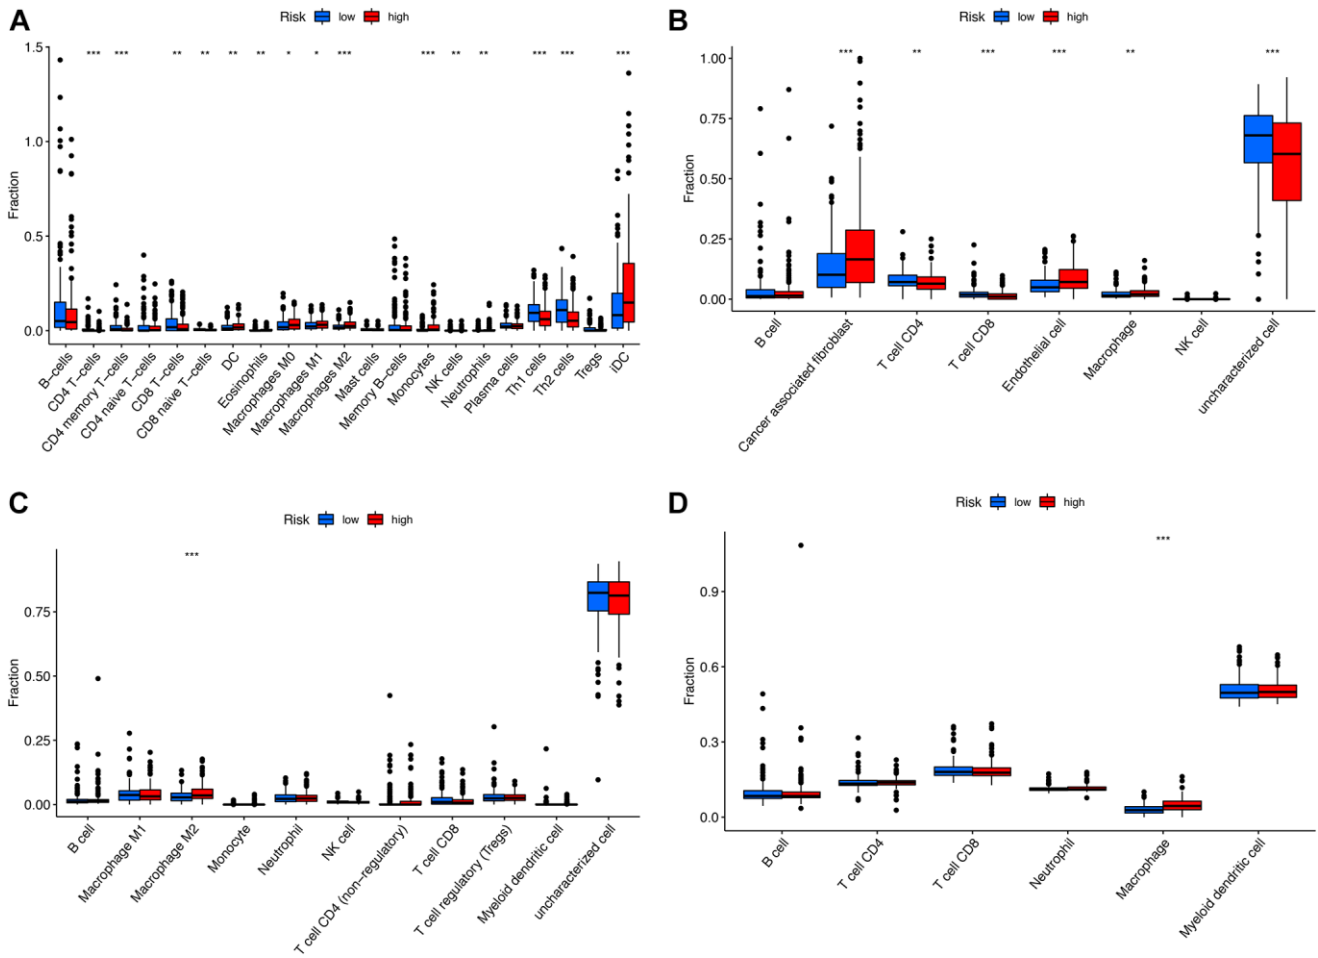

**Supplementary Figure 4.** The immune cell infiltration in different risk groups analyzed by XCELL (A), EPIC (B), QUANTISEQ (C), and TIMER (D).

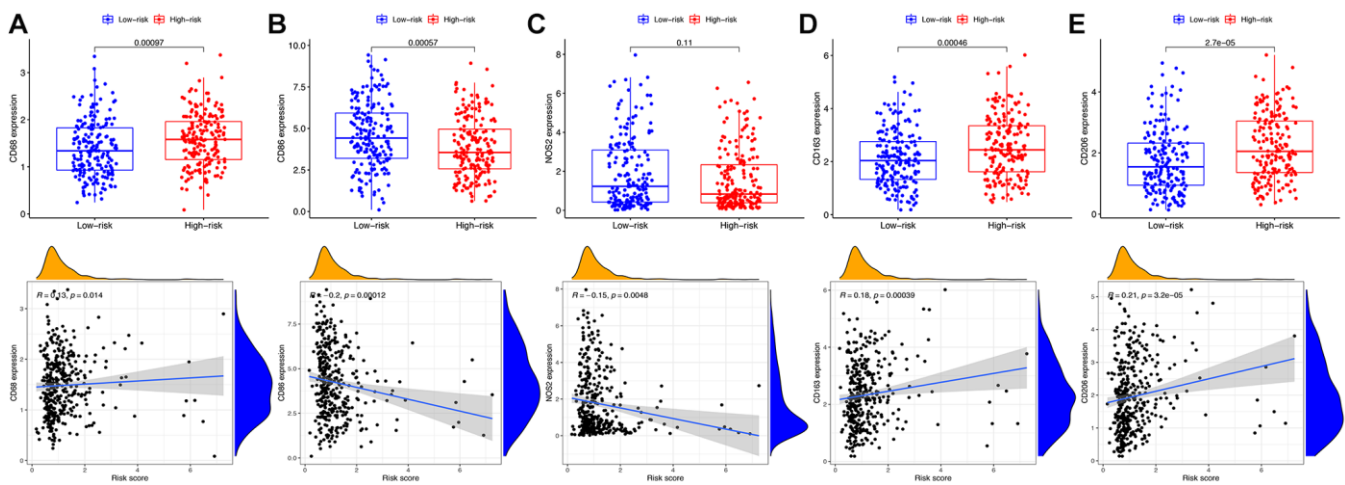

**Supplementary Figure 5.** The expression of markers for M0 macrophages (A), M1 macrophages (B, C), M2 macrophages (D, E).

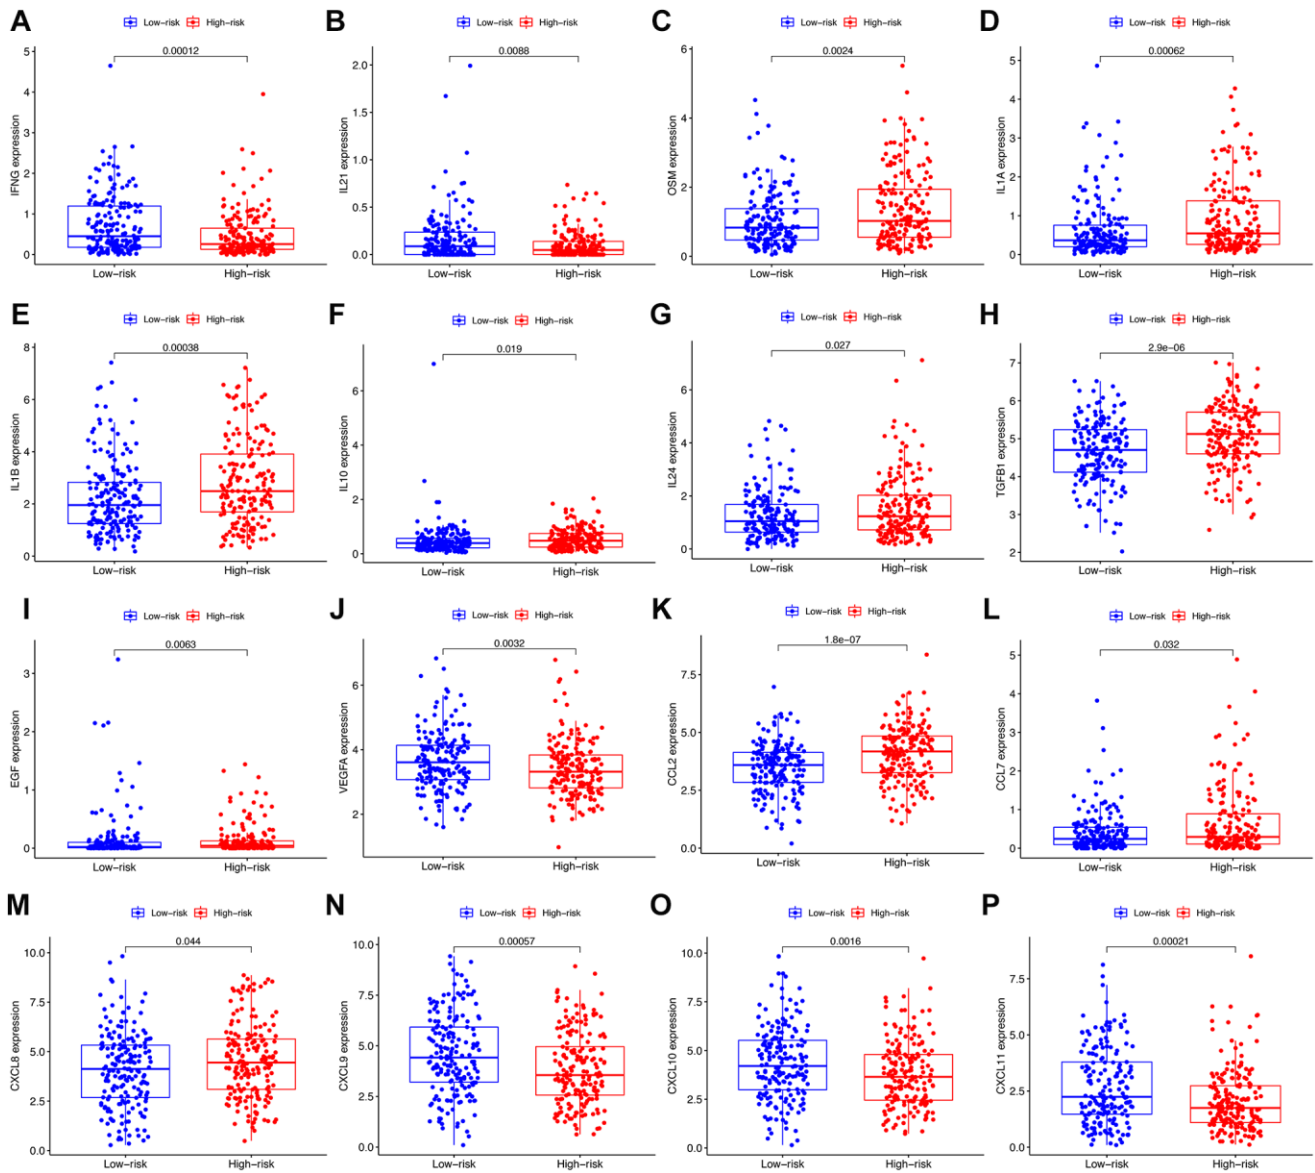

**Supplementary Figure 6.** The expression of cytokine (A–J) and chemokine (K–P).

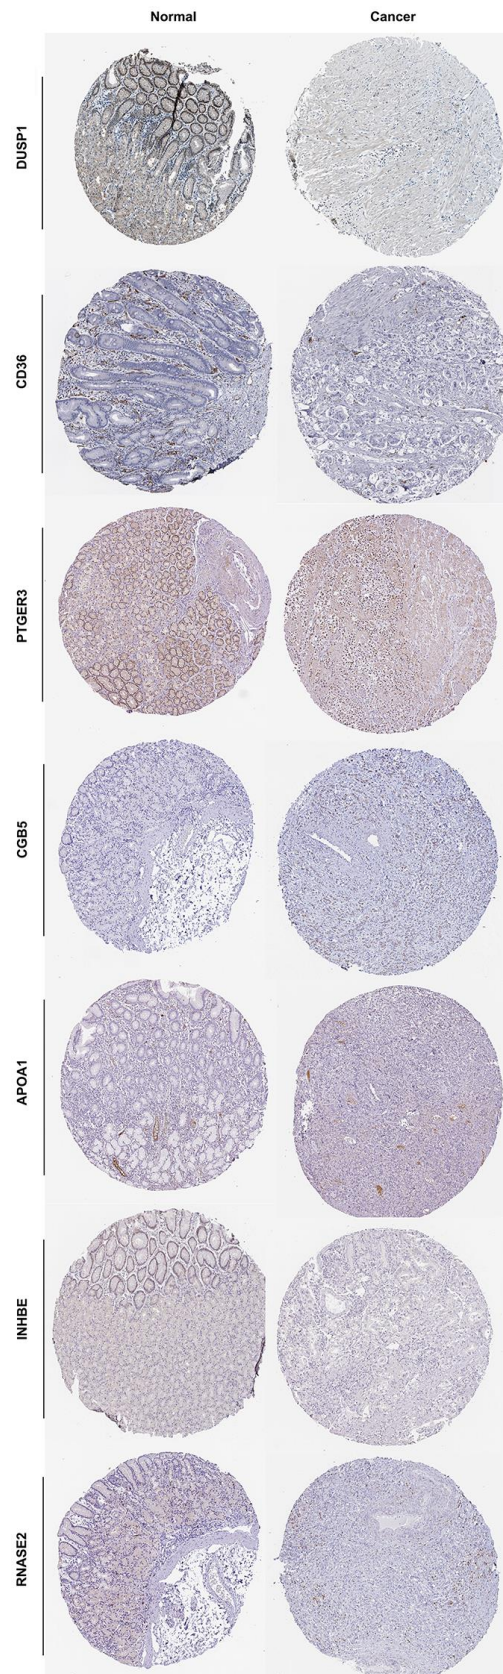

Supplementary Figure 7. The immunohistochemical analysis of the protein expression of the genes in the IRS in the HPA database.

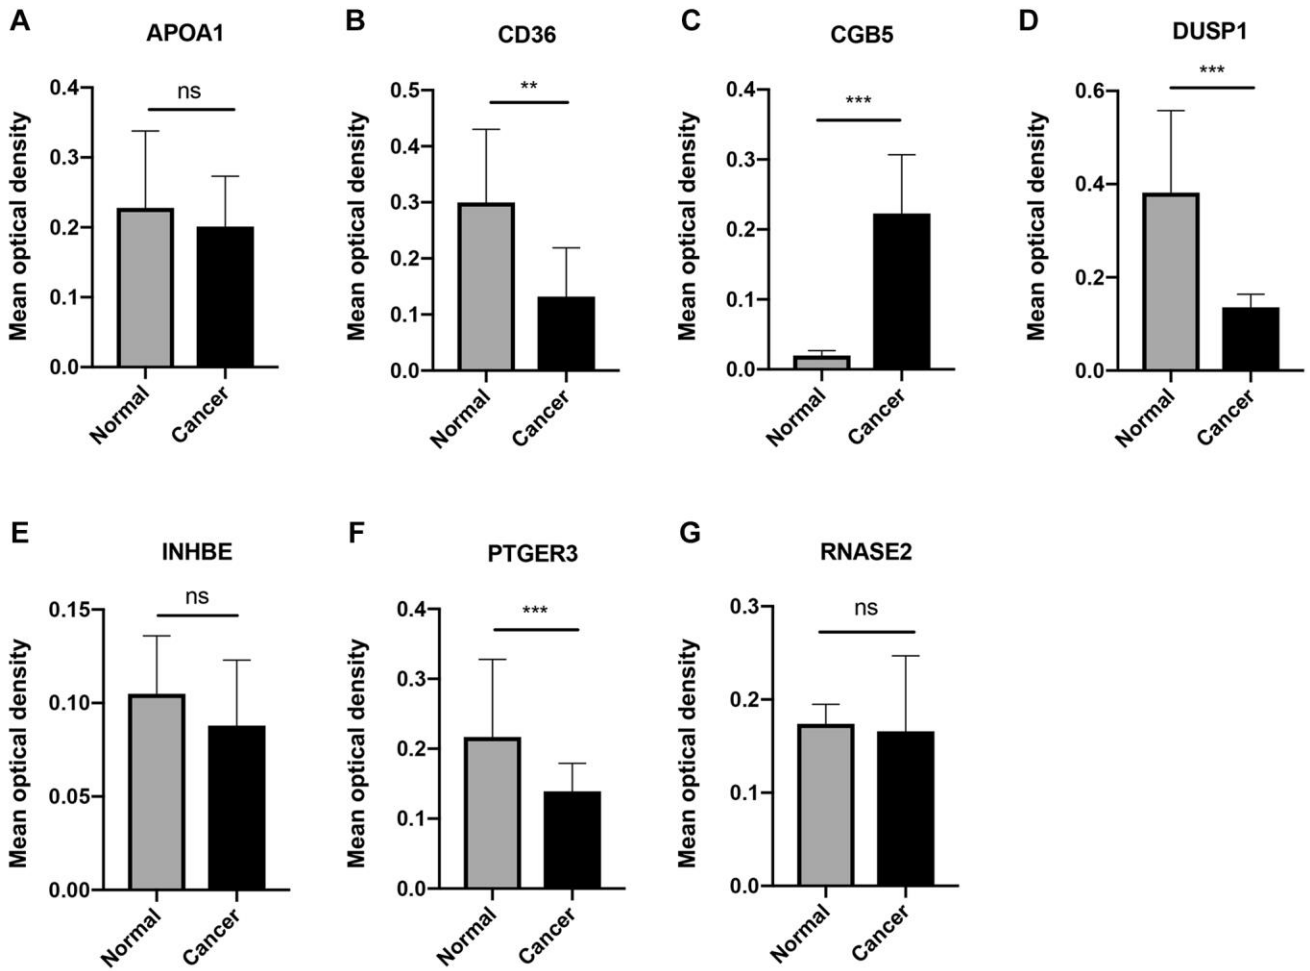

**Supplementary Figure 8.** The quantitative analysis of immunohistochemical images. The quantitative analysis plots of APOA1 (A), CD36 (B), CGB5 (C), DUSP1 (D), INHBE (E), PTGER3 (F), RNASE2 (G). Data are presented as mean  $\pm$  SD, \*\* $P < 0.01$ , \*\*\* $P < 0.001$ , and 'ns' represents no statistical significance.
