# Supplementary material for: An immune-related prognostic signature associated with immune landscape and therapeutic responses in gastric cancer
Source: publisher site journal article supplement (doi:10.18632/aging.204534), 2023-02-22
Supplement: Supplementary file [file aging-v15i4-204534-supplementary-material-SD8.pdf]

**Supplementary Table 9. The immune-related genes integrated by two databases.**

**Gene**

---

AZGP1

B2M

CALR

CANX

CD1A

CD1B

CD1C

CD1D

CD1E

CD4

CD8A

CD8B

CD74

CREB1

CTSB

CTSE

CTSL

CTSS

FCER1G

FCGRT

PDIA3

HFE

HLA-A

HLA-B

HLA-C

HLA-DMA

HLA-DMB

HLA-DOA

HLA-DOB

HLA-DPA1

HLA-DPB1

HLA-DQA1

HLA-DQA2

HLA-DQB1

HLA-DRA

HLA-DRB1

HLA-DRB3

HLA-DRB4

HLA-DRB5

HLA-E  
HLA-F  
HLA-G  
HLA-H  
MR1  
HSPA1A  
HSPA1B  
HSPA1L  
HSPA2  
HSPA4  
HSPA5  
HSPA6  
HSPA8  
HSP90AA1  
HSP90AB1  
ICAM1  
IFNA1  
IFNA2  
IFNA4  
IFNA5  
IFNA6  
IFNA7  
IFNA8  
IFNA10  
IFNA13  
IFNA14  
IFNA16  
IFNA17  
IFNA21  
IFNG  
KIR2DL1  
KIR2DL2  
KIR2DL3  
KIR2DL4  
KIR2DS1  
KIR2DS3  
KIR2DS4  
KIR2DS5  
KIR3DL1  
KIR3DL2  
KLRC1

KLRC2  
KLRC3  
KLRD1  
LTA  
CIITA  
MICA  
MICB  
NFYA  
NFYB  
NFYC  
LGMN  
PSMB8  
PSMC1  
PSMC2  
PSMC3  
PSMC4  
PSMC5  
PSMC6  
PSMD1  
PSMD2  
PSMD3  
PSMD4  
PSMD5  
PSMD7  
PSMD8  
PSMD10  
PSMD11  
PSMD13  
PSME1  
PSME2  
RELB  
RFX5  
RFXAP  
SLC10A2  
TAP1  
TAP2  
TAPBP  
THBS1  
SEM1  
KLRC4  
AP3B1

RFXANK  
PSMD6  
PSME3  
PSMD14  
CLEC4M  
IFI30  
PROCR  
ADRM1  
ECPAS  
TRPC4AP  
CD209  
UBXN1  
ERAP1  
TAPBPL  
KIR2DL5A  
ERAP2  
ULBP3  
ULBP2  
ULBP1  
KIR3DL3  
RAET1E  
RAET1L  
UBR1  
RAET1G  
PDIA2  
HAMP  
PI3  
CAMP  
DEFB4A  
PPBP  
REG3G  
CXCL14  
CXCL16  
SLPI  
CXCL8  
CXCL10  
CXCL9  
CXCL5  
CXCL11  
CXCL6  
CXCL1

CXCL12  
CXCL13  
CXCL2  
PF4  
XCL1  
CXCL3  
DEFB103B  
CCL13  
CCL1  
DEFB1  
CCL8  
ELANE  
DEFB103A  
DEFA3  
DEFA1  
TMSB10  
DEFA6  
DEFA5  
DEFA4  
LCN2  
LCN1  
COLEC10  
BPI  
S100A9  
S100A8  
DCD  
LCN6  
S100A12  
HTN3  
LCN8  
DEFA1B  
CCR10  
CELA1  
DEFB106A  
PENK  
BPIFC  
MMP12  
BPIFB6  
LEAP2  
SFTPD  
LCN9

BPIFB2  
PTGDS  
TMSB4X  
PGLYRP1  
ZC3HAV1  
TMSB15A  
S100B  
S100A13  
S100A6  
DEFB119  
DEFB107A  
DEFB105A  
SERPIND1  
DEFB129  
DEFB127  
S100P  
S100A7  
DEFB104A  
DEFB126  
DEFB106B  
DEFB104B  
DEFB107B  
PGLYRP3  
PGLYRP2  
S100A10  
S100A2  
DEFB125  
DEFB123  
DEFB105B  
DEFB132  
BPIFB3  
LCN12  
PGLYRP4  
S100A11  
S100A5  
S100A3  
S100A1  
DEFB128  
DEFB108B  
HTN1  
LMBR1L

S100A7A  
DEFB118  
COLEC12  
TMSB4Y  
DEFB131A  
DEFB134  
DEFB130A  
DEFB124  
DEFB121  
DEFB116  
DEFB115  
DEFB114  
DEFB113  
DEFB112  
DEFB110  
TMSB15B  
DEFB133  
S100Z  
MAVS  
TMSB4XP8  
S100A14  
LCN10  
S100A16  
DEFB136  
DEFB135  
DEFB117  
ZC3HAV1L  
S100A7L2  
MBL3P  
DEFB4B  
BPIFB4  
IFNAR1  
AZU1  
DEFB131B  
DEFA1A3  
LCN1P1  
S100G  
DEFA7P  
DEFB130B  
DEFB108F  
DEFB131C

TCHHL1  
TINAGL1  
IFNGR1  
SLC22A17  
WFIKKN1  
WFDC2  
IL6  
UMODL1  
TGFB1  
PF4V1  
MMP9  
ANOS1  
TLR4  
SPAG11B  
A2M  
NFKB1  
APOBEC3G  
FABP6  
NOD2  
MBL2  
SFTPA1  
RBP1  
TLR2  
SLC40A1  
PLAU  
IL1B  
PAEP  
HJV  
MUC5AC  
OBP2A  
PLTP  
MX1  
DDX58  
IFNL1  
IRF3  
SFTPA2  
LPA  
LBP  
RBP4  
NOX4  
LTF



IFNB1  
RBP5  
FABP7  
FABP5  
FABP3  
FABP2  
FABP4  
R3HDML  
BPIFA3  
BPIFB1  
OASL  
CRABP2  
CRABP1  
RBP7  
DUOX1  
OBP2B  
RBP2  
LCN15  
CETP  
FABP12  
FABP9  
BPIFA1  
LCNL1  
C8G  
SPAG11A  
PI15  
NOX1  
PMP2  
APOD  
ORM2  
ORM1  
TNF  
CTSG  
PRTN3  
MAPK1  
PML  
AEN  
CYBB  
BPIFA2  
ISG20  
BCL3

ISG20L2  
NOX5  
NOX3  
DUOX2  
TLR3  
TFRC  
IFIH1  
LRP1  
TRIM5  
IDO1  
GDF15  
NEDD4  
ADIPOQ  
STAT3  
STAT1  
IFNL2  
SOCS3  
SEMG1  
TNFSF10  
CCL20  
SOCS1  
RNASEL  
IRF1  
IL15  
APOBEC3F  
PLAAT4  
CHIT1  
CD40  
TLR7  
PIIA  
ZYX  
NLRX1  
PGC  
VEGFA  
IKBKE  
ISG15  
DHX58  
TNFAIP3  
TFR2  
FCN2  
MUC4

F2R  
ELN  
IL27  
MAPT  
LYZ  
CCL5  
LEP  
CYLD  
KLKB1  
CST4  
CSRP1  
MAPK14  
JUN  
ITGAV  
IRF5  
CCR6  
IL12B  
TLR8  
GNLY  
CD81  
EIF2AK2  
APOM  
CACYBP  
NOD1  
MAPK8  
MAPK3  
BST2  
BPHL  
PLA2G2A  
GRN  
NEWENTRY  
PDGFRA  
GNAI1  
WNT5A  
FURIN  
ADAR  
TYK2  
NOS2  
TRAF3  
TPT1  
TPM2

NEO1  
AHNAK  
TLR1  
TK2  
PRDX2  
MX2  
FGF2  
FGA  
TCF7L2  
F2RL1  
TKFC  
MSR1  
NFKBIZ  
LMBR1  
EPPIN  
SRC  
MPO  
ELAVL1  
ROBO3  
SP1  
SOD1  
PDF  
DLL4  
ECD  
SLC11A1  
DMBT1  
STING1  
SKIV2L  
SEMG2  
DES  
DCK  
DAXX  
TNFRSF10A  
TNFRSF10B  
EED  
CCL4  
LIMS1  
LALBA  
APOBEC3H  
TMPRSS6  
SPINK5

MARCO  
BECN1  
TNFSF11  
KNG1  
CSK  
KLRK1  
KCNH2  
JUND  
JAK1  
CLDN4  
CCL28  
RNASE3  
RN7SL1  
IRF7  
IREB2  
ILK  
IL18  
IL17A  
LTB4R  
APOBEC3A  
MASP2  
TRIM27  
RELA  
IL7R  
IL1A  
PTX3  
IFNAR2  
IFN1@  
SYTL1  
APOBEC3C  
DDX17  
PTGS2  
HTR1A  
SEPTIN7  
CD40LG  
CD14  
MASP1  
PROC  
MAP2K2  
MAP2K1  
HRG

NDRG1  
IRF9  
TRIM22  
LANCL1  
PPP4C  
HMOX1  
HMGB1  
RNASE7  
ABCC4  
HGF  
HDAC1  
IFNLR1  
PLSCR1  
BACH2  
TANK  
PIK3CG  
ARRB1  
RSAD2  
STAB2  
TBK1  
PDYN  
PDGFRB  
PDCD1  
PCSK2  
PCSK1  
ARG2  
AQP9  
FASLG  
APOH  
BIRC5  
ANXA6  
IL22  
VTN  
VIM  
VCAM1  
PRDX1  
GFAP  
GBP2  
ALB  
SLC29A3  
OAS1

AGER  
UNC93B1  
TNFSF4  
NOS1  
ACTG1  
ACTA1  
ACO1  
SERPINA3  
CXCR1  
CCL15  
CCL14  
CCL16  
CCL19  
CCL18  
CCL17  
CCL26  
CCL22  
CCR3  
CCL4L1  
ACKR2  
CCR7  
CCL27  
CCR8  
ACKR4  
CCL2  
CCL21  
CCL7  
CCL3  
CCL11  
CCR5  
CCL23  
CCL25  
CCL3L3  
CCL4L2  
CCL3L1  
CCR1  
CCL24  
XCL2  
CXCR4  
CXCR6  
CCR4

TAFA5  
TAFA3  
TAFA4  
TAFA1  
TAFA2  
CCL15-CCL14  
PTK2B  
IL4  
CDH1  
LTBP1  
IL13  
IL10  
IL2  
PPARG  
FGR  
MIF  
CRP  
JAK2  
PTK2  
PTGDR  
CD86  
HCK  
VDR  
OLR1  
GRK2  
TXK  
RNASE2  
CD79A  
CD79B  
LYN  
SYK  
BTK  
BLNK  
VAV3  
VAV1  
VAV2  
RAC1  
RAC2  
RAC3  
PPP3CA  
PPP3CB



PPP3CC  
CHP1  
PPP3R1  
PPP3R2  
CHP2  
NFAT5  
NFATC1  
NFATC2  
NFATC3  
NFATC4  
HRAS  
KRAS  
NRAS  
FOS  
CARD11  
BCL10  
MALT1  
CHUK  
IKBKB  
IKBKG  
NFKBIA  
NFKBIB  
NFKBIE  
CD19  
CR2  
PIK3R5  
PIK3R1  
PIK3R2  
PIK3R3  
PIK3CA  
PIK3CB  
PIK3CD  
AKT3  
AKT1  
AKT2  
GSK3B  
INPP5D  
CD22  
CD72  
PTPN6  
LILRB3

FCGR2B  
RASGRP3  
PLCG2  
PRKCB  
IFITM1  
IGH  
IGHA1  
IGHA2  
IGHD  
IGHD1-1  
IGHD1-14  
IGHD1-20  
IGHD1-26  
IGHD1-7  
IGHD2-15  
IGHD2-2  
IGHD2-21  
IGHD2-8  
IGHD3-10  
IGHD3-16  
IGHD3-22  
IGHD3-3  
IGHD3-9  
IGHD4-11  
IGHD4-17  
IGHD4-23  
IGHD4-4  
IGHD5-12  
IGHD5-18  
IGHD5-24  
IGHD5-5  
IGHD6-13  
IGHD6-19  
IGHD6-25  
IGHD6-6  
IGHD7-27  
IGHE  
IGHG1  
IGHG2  
IGHG3  
IGHG4

IGHJ1  
IGHJ2  
IGHJ3  
IGHJ4  
IGHJ5  
IGHJ6  
IGHM  
IGHV1-18  
IGHV1-2  
IGHV1-24  
IGHV1-3  
IGHV1-45  
IGHV1-46  
IGHV1-58  
IGHV1-69  
IGHV1-8  
IGHV1-38-4  
IGHV1-69-2  
IGHV2-26  
IGHV2-5  
IGHV2-70  
IGHV3-11  
IGHV3-13  
IGHV3-15  
IGHV3-16  
IGHV3-20  
IGHV3-21  
IGHV3-23  
IGHV3-30  
IGHV3-30-3  
IGHV3-30-5  
IGHV3-33  
IGHV3-35  
IGHV3-38  
IGHV3-43  
IGHV3-48  
IGHV3-49  
IGHV3-53  
IGHV3-64  
IGHV3-66  
IGHV3-7

IGHV3-72  
IGHV3-73  
IGHV3-74  
IGHV3-9  
IGHV3-38-3  
IGHV3-69-1  
IGHV4-28  
IGHV4-30-1  
IGHV4-30-2  
IGHV4-30-4  
IGHV4-31  
IGHV4-34  
IGHV4-39  
IGHV4-4  
IGHV4-59  
IGHV4-61  
IGHV4-38-2  
IGHV5-51  
IGHV5-10-1  
IGHV6-1  
IGHV7-4-1  
IGHV7-81  
IGK  
IGKC  
IGKDEL  
IGKJ  
IGKJ1  
IGKJ2  
IGKJ3  
IGKJ4  
IGKJ5  
IGKV@  
IGKV1-12  
IGKV1-13  
IGKV1-16  
IGKV1-17  
IGKV1-27  
IGKV1-33  
IGKV1-37  
IGKV1-39  
IGKV1-5

IGKV1-6  
IGKV1-8  
IGKV1-9  
IGKV1D-12  
IGKV1D-13  
IGKV1D-16  
IGKV1D-17  
IGKV1D-33  
IGKV1D-37  
IGKV1D-39  
IGKV1D-42  
IGKV1D-43  
IGKV1D-8  
IGKV2-24  
IGKV2-28  
IGKV2-30  
IGKV2-40  
IGKV2D-24  
IGKV2D-28  
IGKV2D-29  
IGKV2D-30  
IGKV2D-40  
IGKV3-11  
IGKV3-15  
IGKV3-20  
IGKV3-7  
IGKV3D-11  
IGKV3D-15  
IGKV3D-20  
IGKV3D-7  
IGKV4-1  
IGKV5-2  
IGKV6-21  
IGKV6D-21  
IGKV6D-41  
IGL  
IGLC1  
IGLC2  
IGLC3  
IGLC6  
IGLC7

IGLJ  
IGLJ1  
IGLJ2  
IGLJ3  
IGLJ4  
IGLJ5  
IGLJ6  
IGLJ7  
IGLV@  
IGLV1-36  
IGLV1-40  
IGLV1-44  
IGLV1-47  
IGLV1-50  
IGLV1-51  
IGLV10-54  
IGLV11-55  
IGLV2-11  
IGLV2-14  
IGLV2-18  
IGLV2-23  
IGLV2-33  
IGLV2-8  
IGLV3-1  
IGLV3-10  
IGLV3-12  
IGLV3-16  
IGLV3-19  
IGLV3-21  
IGLV3-22  
IGLV3-25  
IGLV3-27  
IGLV3-32  
IGLV3-9  
IGLV4-3  
IGLV4-60  
IGLV4-69  
IGLV5-37  
IGLV5-39  
IGLV5-45  
IGLV5-48

IGLV5-52  
IGLV6-57  
IGLV7-43  
IGLV7-46  
IGLV8-61  
IGLV9-49  
C3  
C5  
CCL3P1  
CKLF  
CMA1  
CX3CL1  
CXCL17  
CCN1  
EDN1  
EDN2  
EDN3  
FGF10  
LECT2  
PPBPP1  
PROK2  
SAA1  
SAA2  
SBDS  
SEMA3A  
SEMA3B  
SEMA3C  
SEMA3D  
SEMA3E  
SEMA3F  
SEMA3G  
SEMA4A  
SEMA4B  
SEMA4C  
SEMA4D  
SEMA4F  
SEMA4G  
SEMA5A  
SEMA5B  
SEMA6A  
SEMA6B

SEMA6C  
SEMA6D  
SEMA7A  
SLIT1  
SLIT2  
TNC  
TYMP  
C5AR1  
CCR9  
CCRL2  
CMKLR1  
CX3CR1  
CXCR3  
CXCR5  
ACKR3  
CYSLTR1  
CYSLTR2  
ACKR1  
EDNRA  
EDNRB  
FPR1  
FPR2  
GPR17  
GPR32  
GPR33  
PTGDR2  
C5AR2  
CXCR2  
LTB4R2  
PLAUR  
PLXNA1  
PLXNA2  
PLXNA3  
PLXNA4  
PLXNB1  
PLXNB2  
PLXNB3  
PLXNC1  
PLXND1  
PTAFR  
ROBO1



ROBO2  
RXFP3  
XCR1  
ADM  
ADM2  
AGRP  
AGT  
AMBN  
AMELX  
AMH  
ANGPTL5  
ANGPTL7  
APLN  
AREG  
MANF  
CDNF  
ARTN  
AVP  
BDNF  
BMP1  
BMP10  
BMP15  
BMP2  
BMP3  
BMP4  
BMP5  
BMP6  
BMP7  
BMP8A  
BMP8B  
BTC  
MYDGF  
CALCA  
CALCB  
CAT  
CCK  
CD320  
CD70  
ADA2  
CER1  
CGA

CGB3  
CGB1  
CGB2  
CGB5  
CGB7  
CGB8  
CHGA  
CHGB  
CLCF1  
CLEC11A  
CMTM1  
CMTM2  
CMTM3  
CMTM4  
CMTM5  
CMTM6  
CMTM7  
CMTM8  
CNTF  
CORT  
CRH  
CSF1  
CSF2  
CSF3  
CSH1  
CSH2  
CSHL1  
CSPG5  
CTF1  
CCN2  
DKK1  
EBI3  
EGF  
EPGN  
EPO  
EREG  
ESM1  
FAM3B  
FAM3C  
FAM3D  
FGF1

FGF11  
FGF12  
FGF13  
FGF14  
FGF16  
FGF17  
FGF18  
FGF19  
FGF20  
FGF21  
FGF22  
FGF23  
FGF3  
FGF4  
FGF5  
FGF6  
FGF7  
FGF8  
FGF9  
VEGFD  
FIGNL2  
FLT3LG  
FSHB  
GAL  
GALP  
GAST  
GCG  
GDF1  
GDF10  
GDF11  
GDF2  
GDF3  
GDF5  
GDF6  
GDF7  
GDF9  
GDNF  
GH1  
GH2  
GHRH  
GHRL

GIP  
GKN1  
GMFB  
GMFG  
GNRH1  
GNRH2  
GPHA2  
GPHB5  
GPI  
GREM1  
GREM2  
GRP  
GUCA2A  
HBEGF  
HDGF  
HDGFL3  
IAPP  
IFNE  
IFNK  
IFNW1  
IGF1  
IGF2  
IL11  
IL12A  
IL16  
IL17B  
IL17C  
IL17D  
IL17F  
IL19  
IL1F10  
IL36RN  
IL36A  
IL37  
IL36B  
IL36G  
IL1RN  
IL20  
IL21  
IL23A  
IL24

IL25  
IL26  
IFNL3  
IL3  
IL31  
IL32  
IL33  
IL34  
IL5  
IL6ST  
IL7  
IL9  
INHA  
INHBA  
INHBB  
INHBC  
INHBE  
INS  
INS-IGF2  
INSL3  
INSL4  
INSL5  
INSL6  
JAG1  
JAG2  
FGF7P6  
FGF7P3  
KITLG  
KL  
LACRT  
LEFTY1  
LEFTY2  
LHB  
LIF  
LRSAM1  
LTB  
LTBP2  
LTBP3  
LTBP4  
MDK  
MIA

MLN  
MSTN  
NAMPT  
NDP  
NENF  
NGF  
NMB  
NODAL  
CCN3  
NPFF  
NPPA  
NPPB  
NPPC  
NPY  
NRG1  
NRG2  
NRG3  
NRG4  
NRTN  
NTF3  
NTF4  
NTS  
NUDT6  
OGN  
OSGIN1  
OSM  
OSTN  
OXT  
ENDOU  
PDGFA  
PDGFB  
PDGFC  
PDGFD  
PDGFRL  
PGF  
PMCH  
PNOC  
POMC  
PPBPP2  
PPY  
PRL

PRLH  
PROK1  
PSPN  
PTH  
PTH2  
PTHLH  
PTN  
PYY  
QRF1  
RABEP1  
RABEP2  
REG1A  
RETN  
RETNLB  
RLN1  
RLN2  
RLN3  
SCG2  
SCGB3A1  
SCT  
AIMP1  
SECTM1  
SLURP1  
SPP1  
SST  
STC1  
STC2  
TAC1  
TDGF1  
TDGF1P3  
TG  
TGFA  
TGFB2  
TGFB3  
THPO  
TNFRSF11B  
TNFSF12  
TNFSF13  
TNFSF13B  
TNFSF14  
TNFSF15

TNFSF18  
TNFSF8  
TNFSF9  
TOR2A  
TRH  
TSHB  
TSLP  
TXLNA  
UCN  
UCN2  
UCN3  
UTS2  
UTS2B  
VEGFB  
VEGFC  
VGF  
VIP  
ACVR1B  
ACVR1C  
ACVR2A  
ACVR2B  
ACVRL1  
ADCYAP1R1  
ADIPOR1  
ADIPOR2  
ADRB1  
ADRB2  
AGTR1  
AGTR2  
AMHR2  
ANGPT1  
ANGPT4  
ANGPTL1  
ANGPTL2  
ANGPTL3  
ANGPTL4  
ANGPTL6  
APLNR  
AR  
AVPR1A  
AVPR1B



AVPR2  
BMPR1A  
BMPR1B  
BMPR2  
BRD8  
C3AR1  
CALCR  
CALCRL  
CNTFR  
CRHR1  
CRHR2  
CRIM1  
CRLF1  
CRLF2  
CRLF3  
CSF1R  
CSF2RA  
CSF2RB  
CSF3R  
EGFR  
ENG  
EPOR  
ESR1  
ESR2  
ESRRA  
ESRRB  
ESRRG  
FGFR1  
FGFR2  
FGFR3  
FGFR4  
FGFRL1  
FLT1  
FLT3  
FLT4  
FSHR  
GALR2  
GALR3  
GCGR  
GHR  
GHRHR

GHSR  
GIPR  
GLP1R  
GLP2R  
GNRHR  
GPER1  
HNF4A  
HNF4G  
HTR3A  
HTR3B  
HTR3C  
HTR3D  
HTR3E  
IFNGR2  
IGF1R  
IGF2R  
IL10RA  
IL10RB  
IL11RA  
IL12RB1  
IL12RB2  
IL13RA1  
IL13RA2  
IL15RA  
IL2RB  
IL17RA  
IL17RB  
IL17RC  
IL17RD  
IL17RE  
IL18R1  
IL18RAP  
IL1R1  
IL1R2  
IL1RAP  
IL1RL1  
IL1RL2  
IL20RA  
IL20RB  
IL21R  
IL22RA1

IL22RA2  
IL23R  
IL27RA  
IL2RA  
IL2RG  
IL31RA  
IL3RA  
IL4R  
IL5RA  
IL6R  
IL9R  
INSR  
KDR  
LEPR  
LGR4  
LGR5  
LGR6  
LHCGR  
LIFR  
LTBR  
MC1R  
MC2R  
MC3R  
MC4R  
MCHR1  
MCHR2  
MET  
MLNR  
MPL  
MTNR1A  
MTNR1B  
NGFR  
NMBR  
NPR1  
NPR3  
NR0B1  
NR0B2  
NR1D1  
NR1D2  
NR1H2  
NR1H3

NR1H4  
NR1I2  
NR1I3  
NR2C1  
NR2C2  
NR2E1  
NR2E3  
NR2F1  
NR2F2  
NR2F6  
NR3C1  
NR3C2  
NR4A1  
NR4A2  
NR4A3  
NR5A1  
NR5A2  
NR6A1  
NRP1  
NRP2  
OGFR  
OPRD1  
OPRK1  
OPRL1  
OPRM1  
OSMR  
OXTR  
PGR  
PGRMC2  
PPARA  
PPARD  
PRLHR  
PRLR  
PTGER1  
PTGER2  
PTGER3  
PTGER4  
PTGFR  
PTH1R  
PTH2R  
RARA

RARB  
RARG  
RORA  
RORB  
RORC  
RXFP1  
RXFP2  
RXRA  
RXRB  
RXRG  
S1PR1  
S1PR2  
SCTR  
SDC1  
SDC2  
SDC3  
SDC4  
SORT1  
SSTR1  
SSTR2  
SSTR5  
ST2  
TACR1  
TEK  
TGFBR1  
TGFBR2  
TGFBR3  
THRA  
THRB  
TIE1  
TNFRSF10C  
TNFRSF10D  
TNFRSF11A  
TNFRSF12A  
TNFRSF13B  
TNFRSF13C  
TNFRSF14  
TNFRSF17  
TNFRSF18  
TNFRSF19  
TNFRSF1A

TNFRSF1B  
TNFRSF21  
TNFRSF25  
TNFRSF4  
TNFRSF6B  
TNFRSF8  
TNFRSF9  
TRHR  
TSHR  
TUBB3  
VIPR1  
VIPR2  
PTPN11  
ICAM2  
ITGAL  
ITGB2  
PAK1  
NCR2  
TYROBP  
LCK  
FCGR3A  
FCGR3B  
NCR1  
NCR3  
CD247  
ZAP70  
LCP2  
LAT  
PLCG1  
SH3BP2  
FYN  
SHC2  
SHC4  
SHC3  
SHC1  
GRB2  
SOS1  
SOS2  
ARAF  
BRAF  
RAF1

HCST  
CD48  
CD244  
PRKCA  
PRKCG  
SH2D1B  
SH2D1A  
FAS  
GZMB  
PRF1  
CASP3  
BID  
CD3D  
CD3E  
CD3G  
PTPRC  
ITK  
TEC  
NCK1  
NCK2  
GRAP2  
PAK2  
PAK3  
PAK4  
PAK6  
PAK5  
RHOA  
CDC42  
CD28  
ICOS  
MAP3K8  
MAP3K14  
CTLA4  
CBLC  
CBL  
CBLB  
CDK4  
RASGRP1  
PDK1  
PRKCQ  
TRAC

TRAJ1  
TRAJ2  
TRAJ3  
TRAJ4  
TRAJ5  
TRAJ6  
TRAJ7  
TRAJ8  
TRAJ9  
TRAJ10  
TRAJ11  
TRAJ12  
TRAJ13  
TRAJ14  
TRAJ15  
TRAJ16  
TRAJ17  
TRAJ18  
TRAJ19  
TRAJ20  
TRAJ21  
TRAJ22  
TRAJ23  
TRAJ24  
TRAJ25  
TRAJ26  
TRAJ27  
TRAJ28  
TRAJ29  
TRAJ30  
TRAJ31  
TRAJ32  
TRAJ33  
TRAJ34  
TRAJ35  
TRAJ36  
TRAJ37  
TRAJ38  
TRAJ39  
TRAJ40  
TRAJ41



TRAJ42  
TRAJ43  
TRAJ44  
TRAJ45  
TRAJ46  
TRAJ47  
TRAJ48  
TRAJ49  
TRAJ50  
TRAJ52  
TRAJ53  
TRAJ54  
TRAJ56  
TRAJ57  
TRAJ58  
TRAJ59  
TRAJ61  
TRAV1-1  
TRAV1-2  
TRAV2  
TRAV3  
TRAV4  
TRAV5  
TRAV7  
TRAV8-1  
TRAV8-2  
TRAV8-3  
TRAV8-4  
TRAV8-6  
TRAV8-7  
TRAV9-1  
TRAV9-2  
TRAV10  
TRAV12-1  
TRAV12-2  
TRAV12-3  
TRAV13-1  
TRAV13-2  
TRAV14DV4  
TRAV16  
TRAV17

TRAV18  
TRAV19  
TRAV20  
TRAV21  
TRAV22  
TRAV23DV6  
TRAV24  
TRAV25  
TRAV26-1  
TRAV26-2  
TRAV27  
TRAV29DV5  
TRAV30  
TRAV34  
TRAV35  
TRAV36DV7  
TRAV38-1  
TRAV38-2DV8  
TRAV39  
TRAV40  
TRAV41  
TRBC1  
TRBC2  
TRBD1  
TRBD2  
TRBJ1-1  
TRBJ1-2  
TRBJ1-3  
TRBJ1-4  
TRBJ1-5  
TRBJ1-6  
TRBJ2-1  
TRBJ2-2  
TRBJ2-3  
TRBJ2-4  
TRBJ2-5  
TRBJ2-6  
TRBJ2-7  
TRBV2  
TRBV3-1  
TRBV4-1

TRBV4-2  
TRBV4-3  
TRBV5-1  
TRBV5-4  
TRBV5-5  
TRBV5-6  
TRBV5-7  
TRBV5-8  
TRBV6-1  
TRBV6-2  
TRBV6-3  
TRBV6-4  
TRBV6-5  
TRBV6-6  
TRBV6-7  
TRBV6-8  
TRBV6-9  
TRBV7-2  
TRBV7-3  
TRBV7-4  
TRBV7-6  
TRBV7-7  
TRBV7-8  
TRBV7-9  
TRBV9  
TRBV10-1  
TRBV10-2  
TRBV10-3  
TRBV11-1  
TRBV11-2  
TRBV11-3  
TRBV12-3  
TRBV12-4  
TRBV12-5  
TRBV13  
TRBV14  
TRBV15  
TRBV16  
TRBV17  
TRBV18  
TRBV19

TRBV20-1  
TRBV24-1  
TRBV25-1  
TRBV27  
TRBV28  
TRBV29-1  
TRBV30  
TRDC  
TRDD1  
TRDD2  
TRDD3  
TRDJ1  
TRDJ2  
TRDJ3  
TRDJ4  
TRDV1  
TRDV2  
TRDV3  
TRGV9  
TRGV8  
TRGV5  
TRGV4  
TRGV3  
TRGV2  
TRGJP2  
TRGJP1  
TRGJP  
TRGJ2  
TRGJ1  
TRGC2  
TRGC1  
TRAV6  
Id2  
Iltifb  
PRKRA  
DDX3X  
MIR136  
Mir146  
EFTUD2  
Tlr9  
Atf3

Nlrp3  
IL29  
TRAF6  
Myd88  
IFIT5  
Stat2  
Ticam1  
Casp2  
Pcbp2  
Ube2i  
Baiap211  
CASP1  
PELI3  
Atf7  
MIR223  
CLEC4E  
Usp25  
ITGB1  
DDX60L  
HDAC2  
TET2

5-Mar

Bnip31  
Bnip3  
Cdkn1a  
Nfia  
JMJD6  
PRMT1  
TMEM173  
Nrip1  
Bcl11b  
Card9  
Nlrc5  
C2  
C4B  
Mir485  
Cd47  
SKP2  
IFI27  
Clec4n  
IFIT3

MIR146A  
HACE1  
Retnla  
Mrc1  
Ezh2  
Irf8  
Sppl3  
Ahr  
Lgals3  
Trpm5  
Mb21d1  
TLR5  
Stat6  
Dhcr7  
Sc4mol  
Idi1  
Srebf2  
Mir342  
LGALS1  
Aim2  
Clec4d  
Mtap1s  
Nlrp6  
Atg5  
MIR29A  
Trim12c  
Dhx15  
Ern1  
CEACAM8  
Zbp1  
Hs2st1  
Zfp36  
Dusp1  
Nfkb2  
Ybx1  
AIP  
Ticam2  
Tirap  
DHX33  
MIR362  
Uvrag

Mir125a  
CTSK  
Mir328  
Nlrp12  
DEFB4  
Trem14  
SPHK1  
Peli1  
FCN3  
Icosl  
Smpd13b  
Ctnnb1  
Gsk3a  
UBE2V2  
UBE2N  
UBE2W  
OAS3  
Pycard  
Psen2  
Stmn1  
MAP3K7  
IRAK1  
TIFA  
IFRD1  
PDE12  
PQBP1  
IFI16  
Pten  
Sqstm1  
TREM1  
Dnase2a  
PPARGC1A  
MIR130A  
Tollip  
Pik3c3  
Cav1  
Mir199a-1  
DR1  
CASP4  
Myo18a  
CAPRIN1

G3BP1  
ULK1  
Nfil3  
Anpep  
WFDC12  
Ctnd1  
Ly6g  
HAVCR2  
HIF1A  
Traf2  
Cfp  
Hc  
Wdfy1  
Ear11  
Atm  
ZBTB16  
IL1RAPL1  
IL1F7  
Sf3a1  
CLEC6A  
Cd200r1  
Cd200  
ANO6  
P2RX7  
Zfp423  
Rel  
SLC22A3  
TPP2  
RPS6KA5  
IFITM3  
INSIG1  
AMFR  
Eif4ebp2  
Eif4ebp1  
Anxa1  
Sirpa  
Itgam  
Clec7a  
Irak4  
Tmem126a  
TP53



Atg7  
Arl5b  
MIR548G  
Cebpa  
TLR6  
Adam17  
MIR23A  
Il28ra  
Nlr4  
SMAD4  
SMAD3  
MIR181A2  
Ripk3  
ATF2  
ADCY8  
SCN5A  
ECSIT  
USP2  
Myc  
ARG1  
Rab8a  
PRKX  
PRKACA  
CCNA2  
MIR124-1  
MIR203  
SAMHD1  
Adrbk1  
MIR122  
hsa-mir-146a  
RIPK2  
IRF4  
Ptges  
MFF  
DNM1L  
Mir302b  
MAPK9  
MAP2K7  
Kdm4a  
Nlrp1a  
Prdm1

MYH9  
HNRNPL  
IFIT1  
TRIM14  
Mir149  
Sykb  
TXNIP  
Krt16  
Cd51  
MIR208B  
MIR499A  
IL28B  
Fscn1  
AICDA  
PARD3  
Cd36  
BGN  
Rheb  
Tsc1  
Mtor  
Mir126  
Stat4  
ARF6  
Dusp16  
CTSL1  
GNB2L1  
ELF4  
TNK1  
SLX4  
Bcl2l1  
Bcl2  
Gata3  
EGLN2  
HIF1AN  
Ifi202b  
CRKL  
Numb  
XRCC5  
XRCC6  
PRKDC  
Mfn2

CEBPB  
IL28A  
Nfe2l2  
Keap1  
TRIM25  
RNF135  
Traf5  
Mertk  
Axl  
Tyro3  
LGALS9  
HDAC11  
MIR145  
PARK2  
POLR2F  
MIR141  
PIAS3  
MIR21  
UCP2  
MIR133A1  
RNF125  
Zbtb20  
ASCC3  
WNT9B  
WNT2B  
VPS45  
Sarm1  
ANKRD17  
UCHL1  
Klf4  
Coch  
MIR15B  
Ppp1cc  
Ppp1ca  
MIR517C  
MIR517A  
Mfge8  
MIR3148  
Plunc  
Serpib2  
SFTPA1B;SFTPA1

TRIM63  
TRIM61  
TRIM60  
TRIM55  
TRIM49  
TRIM45  
TRIM42  
TRIM38  
TRIM37  
TRIM36  
TRIM24  
TRIM23  
TRIM6  
MID2  
TRIM67  
TRIM66  
TRIM65  
TRIM56  
TRIM50  
TRIM13  
TRIM9  
TRIM8  
TRIM71  
TRIM58  
TRIM47  
TRIM32  
TRIM26  
TRIM21  
MID1  
TRIM15  
TRIM7  
MUL1  
Gabarap  
MIRLET7B  
Mir135b  
Scaf11  
Naip5  
Fer  
Rad23a  
Lum  
Siglecg

CNOT8  
Chat  
COX5B  
Abl1  
Prked  
Tbx21  
Mir212  
Mir132  
hsa-mir-132  
Cryab  
Drd2  
Tph1  
ITGB3  
Fcnb  
Fena  
Glrx  
Mir497  
MOV10  
Daglb  
MIR187  
TRIM62  
Mir466l  
AI607873  
Pydc3  
Pyhin1  
BC094916  
Gm4955  
TRIM28  
CALCOCO2  
MAP1LC3C  
Foxo3  
VTRNA2-1  
Tnfaip8l2  
Abca1  
Mir467b  
Trp73  
TP73  
MIR10B  
Mcpt4  
Tlr13  
Nlrc3

MIR378  
Cfr  
Ahsg  
Olfm4  
Itgax  
Ms4a8a  
MS4A8B  
Casp7  
MIR1275  
MIR200C  
MIRLET7C  
Pura  
Ace2  
Eif4e  
Edil3  
NLRP4  
Zc3h12a  
P2ry14  
Dusp10  
E2f1  
Rb1  
Dok3  
Dicer1  
Tufm  
mmu-mir-29a  
Gnai2  
Lst1  
Scarb1  
Tsc22d3  
Rhbf2  
Ly96  
LILRA2  
Clec9a  
Pacsin1  
Irak3  
Eps8  
Atf4  
Ehmt2  
1700021K19Rik  
KIAA0226  
Tmed7

TMED7;TICAM2

Cd209a

Ntn1

Jak3

Sharnin

Camkk2

WNT3A

Was

MIR16-2

MIR16-1

Frem1

Usp4

Fstl1

Trib2

Apoa1

Hsp90b1

Trpm2

Itch

Lrrk2

Hp

Unc5cl

Cnot4

Serpinb9

Hsf1

Pros1

Gas6

Cd300lf

Cd300a

Rictor

Ifit2

Yy1

mmu-mir-10a

MIR10A

MRGPRX2

Rgs2

Pcbp1

Trp53

Fance

APOBEC3B

Cdkn2a

Dcn

MIR125B2  
MIR125B1  
Dlk1  
Tnip1  
Pklr  
Serp2  
Fadd  
Pla2g4a  
Gzmm  
SELK  
Aire  
Ppargc1b  
Mapkapk2  
Zfpm2  
Zfpm1  
Gata6  
Gata4  
Stub1  
Serpine1  
NAIP  
Naip2  
Trem2  
Ddx41  
Tax1bp1  
Neu1  
Aqp3  
Elf1  
Muc1  
Rpl19  
Il4ra  
mmu-mir-29b-1  
Rag1  
Snca  
F11  
Trem12  
Hspd1  
Pin1  
Notch1  
Hspa14  
Tgtp1  
Igtf



Irgm1  
Gm16379  
Rarres2  
Kcnj8  
Clec1b  
Dhx36  
Ddx21  
Ddx1  
Cd97  
Jam3  
Ubqln1  
Pmaip1  
Ip6k1  
Khsrp  
Tpst1  
Plec  
VENTX  
Vldlr  
MIR23B  
Cflar  
Cdk6  
MIR107  
Gpr77  
Pik3ap1  
Casp8  
SREBF1  
Atg12  
MIR373  
MIR372  
Akna  
IRAK2  
Gbp10  
Gbp7  
Gbp6  
Gbp1  
Arhgap15  
Tecpr1  
HMGN2  
Map3k5  
Cd46  
FCN1

H2-Ab1  
H2-Aa  
Srxn1  
Gp2  
Hrh4  
Plg  
Impdh2  
C1qc  
C1qb  
C1qa  
Ccbp2  
Xiap  
Birc3  
Birc2  
Defb3  
Raet1c  
Raet1a  
Cops5  
Xbp1  
Trp63  
TP63  
Cltc  
Cebpe  
MoleculeID 216094  
CEBPD  
Coro2a  
TBKBP1  
SIAH2  
CD37  
SLC15A4  
SYP  
MAP2K6  
MMP7  
NLRP2  
NLRP9  
NLRP11  
NLRP13  
NLRP8  
NLRP5  
PSMA7  
CDK9

C8A  
SELE  
C4A  
Mbl1  
Apcs  
Cfh  
PTPN2  
RCAN1  
SMAD7  
ABCG1  
SOCS6  
LGALS2  
MAP3K7IP1  
MLST8  
TCEB2  
MEFV  
AMACR;C1QTNF3  
SCARF1  
CLEC4C  
SIGIRR  
C19orf29  
C9  
PIAS4  
SMAD6  
STAP2  
ARRB2  
REST  
RCOR1  
KAT2B  
NLRP1  
MTA1  
IL8  
CD180  
BCL2A1  
TCEB1  
SIAH1  
LPCAT2  
ACHE  
MoleculeID 32847  
TRAIP  
TRADD

TNIP3  
MAP3K12  
ELMOD2  
RNF41  
BCAR1  
ZMYND11  
CD274  
PDCD1LG2  
SMARCE1  
NKIRAS2  
SOCS2  
NUMBL  
CCDC88A  
RPS19  
CAMK2A  
ANXA4  
RIPK1  
TRAFD1  
ITGA3  
IRF2BP1  
LY86  
RANBP9  
NUP153  
OTUD5  
LILRA4  
CASP12  
CARD18  
CYTIP  
MAFB  
Sirt1  
FLI1  
PTCH1  
CTNNAL1  
IL8RB  
AAMP  
COPS8  
LRRFIP1  
NUP214  
GRK5  
GPSM1  
FBXW5

IRAK1BP1  
KDM1  
RUNX3  
GJA1  
MAP3K7IP2  
MKNK1  
MAP3K4  
GNAI3  
CD53  
SNX27  
RUSC1  
FCGR2A  
hsa-mir-146b  
MFN1  
C4bp  
C4BPB  
C4BPA  
Kitl  
Rftn1  
Hspbp1  
Akap10  
Ptges2  
Stim1  
Orai1  
Itpr3  
Itpr1  
Lrrfip2  
Trib3  
Siglech  
Siglece  
Siglec5  
Siglec1  
SIGLEC15  
SIGLEC11  
SIGLEC9  
SIGLEC8  
SIGLEC7  
SIGLEC6  
SIGLEC10  
Rgmb  
4432412L15Rik

Oas2  
Oas1h  
Oas1g  
Oas1f  
Oas1e  
Oas1d  
Oas1c  
Oas1b  
Oas1a  
Lair1  
C8B  
NLRP10  
CARD16  
OTUD7B  
CFB  
MST1R  
ADAM10  
MAP3K3  
NKIRAS1  
KLK1  
C1S  
MAP3K1  
KPNA1  
C1R  
LY9  
EGR1  
ELP2  
F2RL2  
F2RL3  
CD27  
HOXA9  
GSTP1  
WDR34  
ACAP1  
Anxa2  
CEACAM1  
Tlr11  
CASP6  
Defa20  
PELI2  
hsa-mir-126

FFAR2  
hsa-mir-98  
CISH  
hsa-let-7e  
HMGB3  
HMGB2  
SIVA1  
SNAP23  
IRF2  
PLK1  
TRAF1  
PKN1  
FXR1  
ERBB2IP  
RBCK1  
RNF31  
PIAS1  
WDR62  
DAB2IP  
YJEFN3  
RP5-1000E10.4  
Trim30  
AZI2  
MAP3K7IP3  
APOBEC3G;APOBEC3F  
hsa-mir-152  
hsa-mir-148b  
hsa-mir-148a  
TRAT1  
FCGR1A  
UBD  
CD300E  
CASP10  
IRF6  
VASP  
IFITM2  
RAD21  
RASGEF1B  
NOXA1  
TRPV2  
CYBA

OPTN  
LGALS4  
LGALS8  
HERC5  
CNPY3  
DHCR24  
MIF;SLC2A11  
ILF3  
ATG9A  
TPSB2  
GAB1  
SLAMF1  
GOPC  
YWHAE  
BTN3A3  
BTN3A2  
BTN3A1  
IFI6  
PTMA  
GNB2  
SPI1  
NLRP7  
GLI1  
TOMM70A  
USP17  
Ace  
ETS1  
RAB11A  
FZD1  
DHX9  
DDIT3  
ATG16L1  
OTUB2  
OTUB1  
Padi4  
XDH  
IFNAR2;IL10RB  
Foxa2  
Defb14  
Fcrl5  
ING4



Calm1  
NXN  
SPON2  
CTCF  
RNF5  
PIAS2  
TCF4  
TLR10  
USP7  
CARD6  
C7  
C6  
BDKRB2  
CTSD  
C1QBP  
SCAMP5  
PSTPIP1  
CTSH  
SMARCA4  
NLRP14  
CCNT1  
MAP2K4  
MAP2K3  
SUGT1  
NCKAP1L  
CD63  
SMARCA2  
BMX  
SERPING1  
PRKCE  
STAT5B  
STAT5A  
SOCS5  
RPS6KA4  
SLAMF8  
SLAMF9  
SLAMF6  
SLAMF7

---
