# Supplementary material for: An immune-related prognostic signature associated with immune landscape and therapeutic responses in gastric cancer
Source: publisher site journal article supplement (doi:10.18632/aging.204534), 2023-02-22
Supplement: Supplementary file [file aging-v15i4-204534-supplementary-material-SD9.pdf]

**Supplementary Table 10. Differentially expressed immune-related genes.**

| <b>Gene</b> | <b>logFC</b> | <b>pValue</b> | <b>FDR</b> |
|-------------|--------------|---------------|------------|
| CTSB        | 1.214858985  | 7.38E-12      | 1.11E-10   |
| FCER1G      | 1.148739456  | 6.99E-06      | 2.22E-05   |
| HLA-DOA     | 1.057725837  | 0.012439759   | 0.01876969 |
| HSPA2       | -1.977199635 | 1.42E-05      | 4.21E-05   |
| HSPA6       | 1.84677603   | 0.000131367   | 0.00030858 |
| HSP90AA1    | 1.359119177  | 2.57E-18      | 1.59E-15   |
| HSP90AB1    | 1.256608094  | 1.48E-18      | 1.31E-15   |
| ICAM1       | 1.301246592  | 1.96E-07      | 9.08E-07   |
| IFNG        | 2.121420953  | 2.84E-07      | 1.27E-06   |
| KIR2DS4     | 1.820978688  | 0.00061954    | 0.00124845 |
| MICB        | 1.642175465  | 2.79E-10      | 2.74E-09   |
| PSMD3       | 1.231912345  | 1.59E-12      | 2.84E-11   |
| TAP1        | 1.230887183  | 2.57E-06      | 9.08E-06   |
| TAP2        | 1.203728143  | 6.48E-11      | 7.48E-10   |
| SEM1        | 1.016807816  | 7.15E-10      | 6.27E-09   |
| IFI30       | 1.328074443  | 6.04E-10      | 5.41E-09   |
| PROCR       | 1.01169303   | 0.000144463   | 0.00033637 |
| ULBP3       | 1.500180466  | 1.27E-06      | 4.83E-06   |
| ULBP2       | 1.779910874  | 4.52E-10      | 4.19E-09   |
| ULBP1       | 3.699662389  | 1.86E-12      | 3.27E-11   |
| HAMP        | 1.98680152   | 1.34E-08      | 8.36E-08   |
| DEFB4A      | -1.170188    | 0.000318045   | 0.00068445 |
| CXCL16      | 1.335591063  | 3.20E-11      | 3.99E-10   |
| CXCL8       | 3.524712247  | 4.08E-11      | 4.97E-10   |
| CXCL10      | 3.21464345   | 6.28E-10      | 5.60E-09   |
| CXCL9       | 3.443237622  | 4.08E-11      | 4.97E-10   |
| CXCL5       | 2.570593174  | 0.000747777   | 0.00148198 |
| CXCL11      | 3.404377295  | 5.41E-10      | 4.91E-09   |
| CXCL6       | 3.03337399   | 3.59E-09      | 2.57E-08   |
| CXCL1       | 2.898342335  | 5.31E-11      | 6.25E-10   |
| CXCL12      | -1.208568066 | 1.03E-07      | 5.15E-07   |
| CXCL3       | 1.612221343  | 8.26E-07      | 3.29E-06   |
| DEFA6       | -4.286526663 | 0.017604702   | 0.0256859  |
| DEFA5       | -5.299361472 | 0.001615837   | 0.00296665 |
| LCN1        | 6.03897712   | 4.09E-09      | 2.89E-08   |
| S100A8      | -3.126825236 | 0.001088695   | 0.00208324 |
| LCN6        | -1.752846751 | 1.73E-11      | 2.34E-10   |
| S100A12     | -1.392638681 | 3.16E-07      | 1.39E-06   |

|          |              |             |            |
|----------|--------------|-------------|------------|
| CCR10    | -1.186134117 | 3.40E-06    | 1.16E-05   |
| PENK     | -2.822265122 | 0.003344305 | 0.00573389 |
| MMP12    | 2.585468903  | 1.30E-07    | 6.31E-07   |
| TMSB15A  | 1.885125889  | 1.34E-08    | 8.36E-08   |
| S100B    | -2.05708412  | 1.06E-11    | 1.51E-10   |
| S100A7   | 2.220093975  | 9.20E-05    | 0.00022429 |
| LCN12    | 2.619579159  | 1.88E-08    | 1.13E-07   |
| S100A5   | 1.555066087  | 9.91E-08    | 4.95E-07   |
| S100A3   | 1.365145151  | 1.65E-07    | 7.81E-07   |
| S100A7A  | 3.627548951  | 0.004148378 | 0.00696283 |
| ZC3HAV1L | 1.212064861  | 1.56E-10    | 1.63E-09   |
| AZU1     | 3.959386436  | 0.00037538  | 0.00079536 |
| LCN1P1   | 2.196369964  | 1.36E-05    | 4.05E-05   |
| SLC22A17 | -1.674036954 | 1.09E-08    | 6.91E-08   |
| PF4V1    | 2.175312296  | 2.84E-05    | 7.83E-05   |
| MMP9     | 1.712969523  | 7.58E-08    | 3.90E-07   |
| ANOS1    | 1.865962787  | 3.13E-09    | 2.28E-08   |
| FABP6    | 1.934107978  | 4.03E-06    | 1.35E-05   |
| TLR2     | 1.452516814  | 3.85E-10    | 3.62E-09   |
| PLAU     | 2.363626031  | 2.81E-15    | 1.32E-13   |
| PAEP     | 4.964423022  | 6.30E-09    | 4.24E-08   |
| OBP2A    | 4.493550112  | 4.10E-07    | 1.77E-06   |
| IFNL1    | 1.902273109  | 0.000378733 | 0.00080202 |
| SFTPA2   | 2.2914539    | 0.016286746 | 0.02393334 |
| LBP      | 4.769498658  | 7.14E-07    | 2.89E-06   |
| RBP4     | 2.39136971   | 0.036265551 | 0.04917732 |
| NOX4     | 1.948395229  | 4.55E-12    | 7.21E-11   |
| LTF      | -2.51640745  | 0.019788339 | 0.02852819 |
| FABP4    | -1.673283752 | 9.38E-12    | 1.36E-10   |
| R3HDML   | 3.393804941  | 1.86E-11    | 2.49E-10   |
| RBP7     | -1.167173237 | 3.20E-08    | 1.81E-07   |
| OBP2B    | 6.959255506  | 1.83E-06    | 6.69E-06   |
| RBP2     | -5.545127996 | 0.03240732  | 0.04442149 |
| CETP     | 1.126351992  | 5.58E-10    | 5.04E-09   |
| BPIFA1   | 6.700236748  | 0.001237133 | 0.00233492 |
| PI15     | 1.846859103  | 0.003919789 | 0.00661794 |
| NOX1     | 4.729361985  | 3.05E-12    | 5.03E-11   |
| PMP2     | -2.943554147 | 4.52E-11    | 5.44E-10   |
| CTSG     | -1.25416628  | 3.04E-11    | 3.83E-10   |
| AEN      | 1.039485707  | 1.39E-10    | 1.48E-09   |
| CYBB     | 1.009772343  | 0.000496589 | 0.0010248  |

|           |              |             |            |
|-----------|--------------|-------------|------------|
| BPIFA2    | 4.426011705  | 2.55E-06    | 9.01E-06   |
| TFRC      | 1.507642442  | 4.44E-11    | 5.35E-10   |
| IDO1      | 3.839826962  | 3.85E-08    | 2.14E-07   |
| GDF15     | 2.960186821  | 5.12E-15    | 2.13E-13   |
| ADIPOQ    | -1.515685389 | 6.20E-10    | 5.54E-09   |
| STAT1     | 1.624185661  | 9.58E-14    | 2.47E-12   |
| IFNL2     | 4.322276553  | 1.98E-07    | 9.19E-07   |
| SEMG1     | 3.347942108  | 0.00229697  | 0.00407945 |
| CCL20     | 2.245081711  | 6.27E-05    | 0.00015868 |
| CHIT1     | 3.846352941  | 2.34E-07    | 1.06E-06   |
| PGC       | -2.555190893 | 0.011717063 | 0.0177842  |
| VEGFA     | 1.261171457  | 7.03E-09    | 4.68E-08   |
| ISG15     | 1.298569326  | 4.09E-06    | 1.37E-05   |
| F2R       | 1.849471614  | 2.39E-15    | 1.16E-13   |
| IL27      | 1.658890758  | 5.37E-07    | 2.25E-06   |
| MAPT      | -1.576412162 | 0.0001463   | 0.00034041 |
| CST4      | 6.989281692  | 5.50E-17    | 7.55E-15   |
| CSRP1     | -1.694130336 | 8.00E-07    | 3.20E-06   |
| JUN       | -1.15421683  | 0.000215427 | 0.00048149 |
| BST2      | 1.03896371   | 4.84E-05    | 0.00012575 |
| TPM2      | -2.007616764 | 0.000404111 | 0.00085008 |
| AHNAK     | -1.134491359 | 2.26E-07    | 1.03E-06   |
| FGF2      | -1.489130262 | 0.000129708 | 0.00030514 |
| MSR1      | 2.292961314  | 1.42E-12    | 2.59E-11   |
| DLL4      | 1.260829435  | 2.45E-11    | 3.17E-10   |
| SLC11A1   | 2.007428581  | 5.55E-12    | 8.60E-11   |
| SEMG2     | 4.294093281  | 2.81E-05    | 7.74E-05   |
| DES       | -1.889552131 | 6.23E-09    | 4.19E-08   |
| TNFRSF10A | 1.276877514  | 6.40E-12    | 9.75E-11   |
| TNFRSF10B | 1.705094935  | 5.57E-18    | 2.15E-15   |
| TNFSF11   | 2.724813939  | 2.50E-14    | 7.92E-13   |
| KNG1      | 3.850331067  | 7.54E-10    | 6.55E-09   |
| KLRK1     | 1.084757444  | 0.005388312 | 0.00881167 |
| KCNH2     | -1.278840828 | 0.001070773 | 0.00205338 |
| CLDN4     | 1.377384718  | 4.23E-09    | 2.97E-08   |
| RNASE3    | 2.675020467  | 0.001214375 | 0.00229619 |
| PTX3      | -1.243826361 | 3.24E-07    | 1.43E-06   |
| MASP1     | -1.427424334 | 6.48E-08    | 3.39E-07   |
| PROC      | 1.975327479  | 5.49E-05    | 0.0001409  |
| ABCC4     | 1.115442341  | 1.75E-06    | 6.42E-06   |
| PLSCR1    | 1.034437124  | 3.26E-12    | 5.35E-11   |

|          |              |             |            |
|----------|--------------|-------------|------------|
| PDGFRB   | 1.581836719  | 5.96E-11    | 6.94E-10   |
| PCSK2    | -2.125980902 | 5.92E-13    | 1.20E-11   |
| AQP9     | 1.697546224  | 0.000243604 | 0.00053833 |
| BIRC5    | 1.770492121  | 5.16E-13    | 1.06E-11   |
| TNFSF4   | 1.647776669  | 4.23E-09    | 2.97E-08   |
| NOS1     | -2.566159471 | 4.35E-07    | 1.86E-06   |
| CCL15    | 1.230449431  | 4.48E-06    | 1.49E-05   |
| CCL14    | -1.250606265 | 1.42E-07    | 6.82E-07   |
| CCL18    | 2.253514582  | 3.47E-05    | 9.36E-05   |
| CCL26    | 2.4714125    | 0.001664114 | 0.00304752 |
| CCR8     | 2.74256514   | 6.26E-13    | 1.26E-11   |
| CCL21    | -1.313861675 | 1.02E-08    | 6.53E-08   |
| CCL7     | 4.52854145   | 7.91E-13    | 1.54E-11   |
| CCL3     | 2.103501668  | 1.09E-09    | 9.01E-09   |
| CCL3L3   | 1.89904269   | 1.55E-07    | 7.38E-07   |
| CCL4L2   | 1.165679133  | 1.19E-05    | 3.58E-05   |
| CCR1     | 1.047686175  | 2.85E-05    | 7.84E-05   |
| TAFA5    | 1.795222788  | 1.07E-07    | 5.31E-07   |
| TAFA4    | -3.901732122 | 1.94E-05    | 5.58E-05   |
| CRP      | 5.72484944   | 0.000115316 | 0.00027421 |
| CD86     | 1.046181     | 8.04E-06    | 2.51E-05   |
| OLR1     | 3.398129272  | 8.87E-16    | 5.36E-14   |
| RNASE2   | 2.351035965  | 3.37E-07    | 1.48E-06   |
| LYN      | 1.015131043  | 7.91E-08    | 4.05E-07   |
| VAV2     | 1.336893694  | 1.12E-12    | 2.10E-11   |
| RAC3     | 1.453316634  | 0.002214194 | 0.00394507 |
| KRAS     | 1.297854341  | 1.04E-06    | 4.04E-06   |
| FOS      | -1.172234022 | 4.03E-05    | 0.00010698 |
| CARD11   | 1.189383678  | 3.45E-05    | 9.30E-05   |
| NFKBIE   | 1.036069911  | 2.70E-08    | 1.55E-07   |
| PRKCB    | -1.045428683 | 0.000406513 | 0.00085467 |
| IFITM1   | 1.468197784  | 3.29E-07    | 1.45E-06   |
| IGHA1    | -3.063695171 | 0.003476586 | 0.00593168 |
| IGHA2    | -2.773504664 | 0.003223263 | 0.00554349 |
| IGHD2-15 | -1.992123509 | 0.023869949 | 0.03380698 |
| IGHD3-16 | -1.945750851 | 0.017862635 | 0.02603799 |
| IGHG4    | 1.562922384  | 0.00029958  | 0.00064816 |
| IGHJ1    | -1.84373826  | 0.028978747 | 0.04020684 |
| IGHV3-16 | -3.301380776 | 0.004709755 | 0.00780234 |
| IGHV3-35 | -3.560077283 | 0.010996626 | 0.01679886 |
| IGHV3-38 | -3.131533097 | 0.018686787 | 0.02710734 |

|           |              |             |            |
|-----------|--------------|-------------|------------|
| IGHV3-72  | -2.103556554 | 0.018659873 | 0.0270714  |
| IGKV1-13  | -2.340897713 | 0.015255306 | 0.02257453 |
| IGKV1-17  | -3.255509941 | 0.027011058 | 0.03774441 |
| IGKV1-33  | -3.461033444 | 0.004138222 | 0.00694895 |
| IGKV1-37  | -3.557662179 | 0.000865696 | 0.00169264 |
| IGKV1-39  | -2.810912153 | 0.012885926 | 0.01937142 |
| IGKV1-9   | -2.392695728 | 0.033305606 | 0.04551333 |
| IGKV1D-12 | -3.049920311 | 0.017135801 | 0.0250704  |
| IGKV1D-17 | -2.567640121 | 0.022292384 | 0.0318009  |
| IGKV1D-33 | -3.441864894 | 0.00764923  | 0.01210662 |
| IGKV1D-37 | -3.874889816 | 0.001161536 | 0.00220678 |
| IGKV1D-39 | -3.074528791 | 0.011154364 | 0.01701544 |
| IGKV1D-42 | -3.811116935 | 0.005334051 | 0.00873178 |
| IGKV1D-8  | -3.064186905 | 0.022779046 | 0.03241115 |
| IGKV2-28  | -3.333394914 | 0.012216494 | 0.01847278 |
| IGKV2-30  | -2.565032982 | 0.028907887 | 0.04011897 |
| IGKV2-40  | -3.374628045 | 0.000327301 | 0.00070288 |
| IGKV2D-24 | -2.573925615 | 0.018249861 | 0.02655595 |
| IGKV2D-28 | -3.244381881 | 0.006836785 | 0.01093705 |
| IGKV2D-29 | -3.277285039 | 0.029253388 | 0.04053842 |
| IGKV2D-30 | -3.724686794 | 0.00166388  | 0.00304752 |
| IGKV3-7   | -3.463463343 | 0.023771428 | 0.03368356 |
| IGKV3D-11 | -2.798975561 | 0.027667664 | 0.03855697 |
| IGKV3D-15 | -3.38599769  | 0.016289717 | 0.02393507 |
| IGKV3D-7  | -3.761205919 | 0.000601123 | 0.00121529 |
| IGKV6D-41 | -2.85608969  | 0.001603975 | 0.00294711 |
| IGLC6     | -2.49810142  | 0.01369484  | 0.02045741 |
| IGLJ1     | -2.156510613 | 0.001275062 | 0.00239852 |
| IGLV1-36  | -1.792206055 | 0.035570113 | 0.04833022 |
| IGLV1-50  | -3.621034076 | 0.001304852 | 0.00244585 |
| IGLV2-18  | -2.684344569 | 0.015504523 | 0.02291023 |
| IGLV2-33  | -3.713235512 | 0.007227748 | 0.0114969  |
| IGLV2-8   | -2.773580443 | 0.029022967 | 0.04024305 |
| IGLV3-10  | -2.432837382 | 0.035711112 | 0.04848987 |
| IGLV3-16  | -3.244630722 | 0.022079465 | 0.03153262 |
| IGLV3-22  | -1.113862727 | 0.019507448 | 0.02816133 |
| IGLV3-32  | -2.944648693 | 0.000308059 | 0.00066477 |
| IGLV4-3   | -4.774302439 | 0.003343896 | 0.00573356 |
| IGLV5-37  | -2.327139103 | 0.015833012 | 0.0233348  |
| IGLV7-43  | -3.007907038 | 0.024071284 | 0.03404689 |
| IGLV7-46  | -3.262236618 | 0.033630541 | 0.04593852 |

|          |              |             |            |
|----------|--------------|-------------|------------|
| IGLV8-61 | -2.019500911 | 0.026155487 | 0.03669056 |
| C3       | 1.154099081  | 0.012886407 | 0.01937142 |
| CKLF     | 1.150545653  | 1.63E-10    | 1.70E-09   |
| CMA1     | -1.955005622 | 1.26E-12    | 2.33E-11   |
| CXCL17   | -1.626986053 | 6.88E-05    | 0.0001725  |
| EDN1     | 1.170545427  | 2.53E-05    | 7.06E-05   |
| EDN2     | -1.919148651 | 6.07E-05    | 0.00015408 |
| EDN3     | -1.977621065 | 0.001053094 | 0.00202259 |
| FGF10    | -1.065280828 | 6.11E-05    | 0.000155   |
| SAA2     | 3.396887798  | 0.000737218 | 0.00146301 |
| SEMA4F   | 1.048429743  | 4.57E-10    | 4.23E-09   |
| SEMA5B   | 1.983463936  | 1.44E-12    | 2.61E-11   |
| SEMA6D   | -1.589232328 | 0.00017996  | 0.00041031 |
| SLIT2    | -1.120472149 | 0.001462607 | 0.00271186 |
| TYMP     | 1.381760406  | 1.43E-07    | 6.87E-07   |
| CYSLTR1  | -1.062724856 | 0.000135603 | 0.0003176  |
| ACKR1    | -1.432664596 | 4.25E-11    | 5.15E-10   |
| GPR17    | -1.440736904 | 6.57E-05    | 0.00016558 |
| PTGDR2   | -2.192059963 | 0.000367433 | 0.00078045 |
| CXCR2    | -1.763055352 | 0.000365247 | 0.0007763  |
| PLAUR    | 1.149293268  | 2.28E-07    | 1.04E-06   |
| PLXNA1   | 1.405623753  | 2.78E-15    | 1.31E-13   |
| PLXNA3   | 1.299559066  | 3.06E-13    | 6.78E-12   |
| PLXNC1   | 1.021256004  | 2.58E-05    | 7.20E-05   |
| PLXND1   | 1.099815839  | 3.43E-08    | 1.93E-07   |
| AGT      | 2.348766356  | 2.01E-06    | 7.27E-06   |
| AMELX    | 2.561182771  | 3.36E-06    | 1.15E-05   |
| AMH      | 3.382191282  | 1.27E-09    | 1.03E-08   |
| ANGPTL7  | -2.454322168 | 1.97E-06    | 7.12E-06   |
| APLN     | 3.118100798  | 3.86E-14    | 1.14E-12   |
| ARTN     | 1.071917329  | 0.031904827 | 0.04378102 |
| BDNF     | 1.164074385  | 0.001355701 | 0.00253286 |
| BMP1     | 1.530540561  | 1.21E-16    | 1.24E-14   |
| BMP3     | -1.798112221 | 0.000133751 | 0.00031373 |
| BMP5     | -1.138189879 | 4.09E-08    | 2.26E-07   |
| BMP6     | -1.398308738 | 0.000363074 | 0.00077186 |
| BMP8A    | 2.273115076  | 7.90E-15    | 3.03E-13   |
| BTC      | -1.479631879 | 0.000175523 | 0.00040112 |
| CCK      | -1.04477734  | 7.68E-05    | 0.00019068 |
| CD70     | 1.586857448  | 0.000278575 | 0.0006073  |
| CGB5     | 7.940121123  | 5.21E-07    | 2.19E-06   |

|        |              |             |            |
|--------|--------------|-------------|------------|
| CHGA   | -1.343468862 | 3.34E-07    | 1.47E-06   |
| CMTM1  | 1.384307032  | 2.75E-14    | 8.61E-13   |
| CSF2   | 4.688076547  | 3.84E-13    | 8.21E-12   |
| DKK1   | 2.773785869  | 0.015808124 | 0.02329964 |
| ESM1   | 5.063219418  | 3.05E-20    | 4.50E-16   |
| FAM3B  | -1.514629087 | 1.50E-05    | 4.44E-05   |
| FAM3D  | -1.246297902 | 0.000303222 | 0.00065519 |
| FGF19  | 8.294004292  | 8.05E-12    | 1.20E-10   |
| FGF3   | 6.631580031  | 2.60E-05    | 7.24E-05   |
| VEGFD  | -2.671207066 | 3.42E-16    | 2.53E-14   |
| GCG    | -1.103113626 | 6.95E-05    | 0.00017409 |
| GDF10  | -1.297842271 | 1.19E-06    | 4.55E-06   |
| GDF7   | -1.437296943 | 2.92E-08    | 1.67E-07   |
| GHRL   | -2.54541629  | 0.008321168 | 0.01306225 |
| GIP    | -5.272939042 | 0.000193373 | 0.00043738 |
| GKN1   | -4.413963865 | 5.78E-07    | 2.40E-06   |
| GNRH2  | 1.24414437   | 0.000479019 | 0.000992   |
| IL11   | 3.60095304   | 3.07E-14    | 9.39E-13   |
| IL17B  | -1.124960889 | 0.000743534 | 0.00147435 |
| IL17C  | 3.001440056  | 3.90E-05    | 0.00010387 |
| IL37   | 4.215475971  | 2.97E-11    | 3.76E-10   |
| IL23A  | 1.213146158  | 1.53E-10    | 1.61E-09   |
| IL24   | 1.586752684  | 4.43E-06    | 1.47E-05   |
| IFNL3  | 5.082695399  | 1.27E-06    | 4.82E-06   |
| INHBA  | 3.765640856  | 2.88E-18    | 1.63E-15   |
| INHBB  | 1.840921632  | 0.000726805 | 0.00144385 |
| INHBE  | 1.631792074  | 3.14E-08    | 1.78E-07   |
| INSL6  | 2.152080211  | 0.013479795 | 0.02016784 |
| JAG2   | 1.214331465  | 2.50E-10    | 2.48E-09   |
| LEFTY1 | 5.544755943  | 0.000199993 | 0.00045035 |
| LIF    | 2.635640149  | 2.23E-16    | 1.86E-14   |
| MDK    | 1.304767595  | 5.43E-07    | 2.27E-06   |
| MLN    | -2.565656234 | 0.022066041 | 0.03151683 |
| NMB    | 1.295725964  | 1.29E-08    | 8.08E-08   |
| NPPA   | 1.001581633  | 0.002088706 | 0.0037415  |
| NPPC   | -2.737151863 | 4.20E-10    | 3.93E-09   |
| NPY    | -1.739959688 | 2.63E-07    | 1.19E-06   |
| NRG2   | -1.737949346 | 4.16E-09    | 2.93E-08   |
| NRG3   | -1.294656694 | 0.000412014 | 0.00086494 |
| NRG4   | -1.264405723 | 0.000115638 | 0.0002749  |
| OGN    | -1.033643783 | 3.85E-06    | 1.30E-05   |

|           |              |             |            |
|-----------|--------------|-------------|------------|
| OSGIN1    | -1.452616987 | 6.08E-07    | 2.51E-06   |
| OSM       | 1.981886502  | 1.53E-06    | 5.70E-06   |
| ENDOU     | -4.504710061 | 4.18E-06    | 1.40E-05   |
| PDGFB     | 1.132810693  | 2.13E-09    | 1.63E-08   |
| PGF       | 1.47010561   | 6.54E-12    | 9.93E-11   |
| PMCH      | 2.617979758  | 7.40E-10    | 6.46E-09   |
| PNOC      | -1.857782912 | 2.03E-06    | 7.32E-06   |
| PTN       | -1.925389668 | 1.24E-11    | 1.74E-10   |
| RETN      | 1.389670192  | 0.000711185 | 0.00141546 |
| RLN2      | 1.135840921  | 0.010475521 | 0.0160821  |
| SPP1      | 4.341971278  | 6.70E-14    | 1.81E-12   |
| SST       | -1.879562346 | 5.00E-07    | 2.11E-06   |
| STC1      | 1.289294134  | 1.20E-07    | 5.85E-07   |
| STC2      | 1.991329991  | 3.13E-11    | 3.92E-10   |
| TAC1      | -1.890395465 | 0.000120023 | 0.00028444 |
| TG        | 1.120749887  | 0.008398336 | 0.01316942 |
| TNFRSF11B | 3.395735904  | 6.21E-11    | 7.21E-10   |
| TNFSF12   | -1.113752377 | 3.77E-05    | 0.00010072 |
| TNFSF13B  | 1.063313559  | 1.26E-05    | 3.77E-05   |
| TNFSF15   | 1.483018055  | 1.49E-09    | 1.19E-08   |
| TNFSF18   | 1.816965876  | 9.23E-05    | 0.00022482 |
| TNFSF9    | 2.157843531  | 7.98E-06    | 2.50E-05   |
| TSLP      | -1.881405252 | 1.13E-09    | 9.33E-09   |
| UCN       | 1.533597132  | 3.12E-10    | 3.02E-09   |
| UCN2      | 2.517585237  | 2.07E-10    | 2.09E-09   |
| UTS2      | 2.477140311  | 5.39E-06    | 1.76E-05   |
| VIP       | -2.667953752 | 2.63E-05    | 7.31E-05   |
| ADCYAP1R1 | -2.862491338 | 1.30E-09    | 1.05E-08   |
| ADRB2     | -1.860139611 | 4.14E-15    | 1.81E-13   |
| AGTR1     | -1.72575854  | 2.11E-07    | 9.71E-07   |
| ANGPT1    | -1.156852993 | 0.007069613 | 0.01126554 |
| ANGPTL1   | -2.450174425 | 5.58E-10    | 5.04E-09   |
| ANGPTL6   | -1.426861318 | 0.026795389 | 0.03748006 |
| APLNR     | 1.180649673  | 3.77E-05    | 0.00010072 |
| AR        | -1.431080587 | 1.07E-05    | 3.24E-05   |
| C3AR1     | 1.056681921  | 0.00046833  | 0.00097198 |
| CNTFR     | -1.357913438 | 1.21E-10    | 1.30E-09   |
| CSF2RA    | 1.051736569  | 2.44E-05    | 6.85E-05   |
| ESRRB     | -1.595125762 | 0.007203237 | 0.01146046 |
| ESRRG     | -2.980857548 | 1.34E-12    | 2.46E-11   |
| FGFR4     | 2.295927369  | 1.31E-12    | 2.42E-11   |



|           |              |             |            |
|-----------|--------------|-------------|------------|
| FGFRL1    | 1.070427521  | 0.000276888 | 0.00060402 |
| GHR       | -1.808369591 | 5.04E-11    | 5.96E-10   |
| GLP2R     | -1.556935124 | 2.17E-06    | 7.80E-06   |
| GPBR1     | -2.010034831 | 2.61E-09    | 1.94E-08   |
| IL13RA2   | 2.995558668  | 2.74E-08    | 1.57E-07   |
| IL17RB    | 2.262502094  | 4.64E-15    | 1.97E-13   |
| IL2RA     | 1.414879546  | 6.71E-08    | 3.50E-07   |
| LGR5      | 3.144521251  | 1.12E-07    | 5.51E-07   |
| LIFR      | -1.025650958 | 6.09E-08    | 3.20E-07   |
| MC1R      | 1.590378176  | 2.48E-13    | 5.63E-12   |
| MET       | 2.491116347  | 1.68E-15    | 8.74E-14   |
| MLNR      | -2.921876313 | 0.000440234 | 0.00091896 |
| NPR1      | -1.403978613 | 4.00E-06    | 1.35E-05   |
| NPR3      | -1.0312183   | 0.000150039 | 0.00034814 |
| NR2C1     | 1.055384929  | 1.80E-14    | 6.05E-13   |
| NR4A1     | -1.32163122  | 0.027337972 | 0.03816686 |
| NR4A3     | -2.156697512 | 0.006776404 | 0.01084632 |
| NR5A2     | 1.051476826  | 1.40E-05    | 4.16E-05   |
| NR6A1     | 1.518994278  | 1.34E-09    | 1.08E-08   |
| OSMR      | 1.443990344  | 6.54E-10    | 5.79E-09   |
| OXTR      | 1.522828352  | 8.60E-12    | 1.27E-10   |
| PGR       | -1.748589002 | 5.99E-06    | 1.93E-05   |
| PTGER3    | -1.105005683 | 2.55E-05    | 7.11E-05   |
| PTH1R     | -1.55129281  | 2.35E-09    | 1.77E-08   |
| PTH2R     | 3.316792445  | 0.005698063 | 0.00926901 |
| RXRG      | -2.881196551 | 8.09E-14    | 2.12E-12   |
| SSTR5     | 2.293632371  | 0.015558697 | 0.02298646 |
| TGFBR3    | -1.415587686 | 5.00E-05    | 0.0001296  |
| TNFRSF10C | 1.028446833  | 0.009122169 | 0.01419833 |
| TNFRSF12A | 1.19581959   | 2.17E-09    | 1.65E-08   |
| TNFRSF17  | -2.465916136 | 0.022362529 | 0.03189585 |
| TNFRSF25  | 1.616570199  | 2.14E-10    | 2.16E-09   |
| TNFRSF9   | 1.630672776  | 3.81E-10    | 3.59E-09   |
| TUBB3     | 2.338402881  | 1.54E-11    | 2.11E-10   |
| VIPR2     | -1.531186555 | 1.68E-07    | 7.93E-07   |
| FCGR3A    | 2.513647467  | 1.91E-12    | 3.33E-11   |
| PRKCG     | 3.738441504  | 1.37E-09    | 1.10E-08   |
| GZMB      | 1.220667147  | 0.013943599 | 0.02079287 |
| BID       | 1.265331218  | 2.29E-13    | 5.25E-12   |
| CTLA4     | 1.294041489  | 5.88E-08    | 3.10E-07   |
| TRAJ1     | 1.51526094   | 0.012314288 | 0.01860165 |

|          |              |             |            |
|----------|--------------|-------------|------------|
| TRAJ2    | 2.101154927  | 2.98E-05    | 8.17E-05   |
| TRAJ3    | 1.250724012  | 0.009534331 | 0.01477253 |
| TRAJ5    | 1.828367634  | 0.001555043 | 0.0028665  |
| TRAJ19   | 1.274452845  | 0.002231387 | 0.00397331 |
| TRAJ23   | 1.751376857  | 0.001893911 | 0.00342039 |
| TRAJ31   | 1.144467943  | 0.031062304 | 0.04274597 |
| TRAJ34   | 1.831773997  | 0.009437517 | 0.01463274 |
| TRAJ35   | 1.507677681  | 0.007717595 | 0.01220685 |
| TRAJ36   | 1.547869411  | 0.002578933 | 0.00452264 |
| TRAJ37   | 2.753064244  | 3.55E-05    | 9.54E-05   |
| EFTUD2   | 1.057826222  | 5.59E-16    | 3.73E-14   |
| NLRC5    | 1.442772179  | 3.09E-10    | 2.99E-09   |
| C2       | 1.747130343  | 1.46E-09    | 1.16E-08   |
| C4B      | 1.269733423  | 0.00016079  | 0.0003705  |
| SKP2     | 1.578690957  | 7.37E-14    | 1.96E-12   |
| IFIT3    | 1.131043219  | 4.43E-05    | 0.00011629 |
| CEACAM8  | 2.148299344  | 9.82E-07    | 3.84E-06   |
| SPHK1    | 1.125066852  | 1.03E-07    | 5.15E-07   |
| OAS3     | 1.551225425  | 4.25E-11    | 5.15E-10   |
| IRAK1    | 1.02027373   | 9.72E-11    | 1.07E-09   |
| AIM2     | 1.184371393  | 0.001700083 | 0.00310762 |
| TREM1    | 1.699442965  | 2.53E-05    | 7.06E-05   |
| HAVCR2   | 1.674958119  | 1.53E-10    | 1.61E-09   |
| ZBTB16   | -2.45154655  | 7.73E-11    | 8.75E-10   |
| CLEC6A   | 1.442357141  | 0.000407471 | 0.00085661 |
| IFITM3   | 1.032094949  | 1.13E-07    | 5.56E-07   |
| MIR181A2 | 2.572760065  | 8.20E-06    | 2.56E-05   |
| USP2     | -2.040541769 | 3.31E-09    | 2.39E-08   |
| PRKX     | 1.053507475  | 2.58E-09    | 1.92E-08   |
| CCNA2    | 1.737279007  | 3.91E-13    | 8.34E-12   |
| RIPK2    | 1.65081666   | 2.84E-19    | 1.26E-15   |
| TXNIP    | -1.137934967 | 1.09E-06    | 4.22E-06   |
| MIR499A  | 1.382944893  | 0.00439439  | 0.00733141 |
| BGN      | 2.909669059  | 1.16E-16    | 1.22E-14   |
| TRAF2    | 1.200728086  | 6.04E-16    | 3.92E-14   |
| PRKDC    | 1.473915509  | 6.96E-16    | 4.39E-14   |
| ASCC3    | 1.0159762    | 3.30E-12    | 5.40E-11   |
| TRIM24   | 1.083776802  | 1.37E-09    | 1.10E-08   |
| TRIM50   | -2.971246991 | 2.91E-05    | 8.00E-05   |
| TRIM71   | 5.315716791  | 3.90E-05    | 0.00010387 |
| VTRNA2-1 | -1.445103949 | 0.001939415 | 0.00349662 |

|          |              |             |            |
|----------|--------------|-------------|------------|
| NLRC4    | 1.01739298   | 5.44E-08    | 2.89E-07   |
| CFTR     | 1.328608391  | 0.000567726 | 0.00115417 |
| AHSG     | 5.065104258  | 0.000553332 | 0.00112887 |
| OLFM4    | 1.8319706    | 0.011281375 | 0.01719049 |
| ITGAX    | 2.009393293  | 8.93E-13    | 1.71E-11   |
| MIR200C  | 2.086171135  | 0.000185083 | 0.00042066 |
| P2RY14   | -1.859475889 | 1.06E-11    | 1.51E-10   |
| E2F1     | 2.100134715  | 2.68E-16    | 2.08E-14   |
| TSC22D3  | -1.372220022 | 4.48E-09    | 3.12E-08   |
| CLEC7A   | 1.041595508  | 1.54E-05    | 4.52E-05   |
| RHBDF2   | 1.310820644  | 4.35E-11    | 5.24E-10   |
| DUSP1    | -1.518445415 | 2.90E-09    | 2.13E-08   |
| NTN1     | -1.779046603 | 9.51E-10    | 7.99E-09   |
| MIR16-1  | 2.257765053  | 1.62E-05    | 4.75E-05   |
| TRIB2    | 1.141376708  | 1.10E-07    | 5.43E-07   |
| APOA1    | -3.420695378 | 0.01064282  | 0.01630983 |
| TRPM2    | 1.888795043  | 1.32E-13    | 3.24E-12   |
| SERPINB9 | 1.04100697   | 1.88E-06    | 6.83E-06   |
| CD300LF  | 1.486133964  | 5.99E-08    | 3.15E-07   |
| IFIT2    | 1.172952195  | 4.43E-05    | 0.00011629 |
| RGS2     | -1.593590636 | 2.90E-09    | 2.13E-08   |
| FANCC    | 1.004380854  | 1.14E-14    | 4.08E-13   |
| APOBEC3B | 1.750975323  | 4.25E-08    | 2.32E-07   |
| CDKN2A   | 3.092793207  | 2.89E-06    | 1.01E-05   |
| DCN      | -1.182950285 | 2.81E-07    | 1.26E-06   |
| AIRE     | 2.445756275  | 0.003595441 | 0.00611645 |
| ZFPM2    | -1.193924647 | 0.009418371 | 0.0146039  |
| SERPINE1 | 2.399299923  | 2.67E-11    | 3.42E-10   |
| TREM2    | 3.061726227  | 1.55E-15    | 8.16E-14   |
| AQP3     | -2.056412988 | 0.008554591 | 0.01338923 |
| TREML2   | 1.373254404  | 0.018117188 | 0.02637588 |
| HSPD1    | 1.65800331   | 8.16E-18    | 2.62E-15   |
| DDX21    | 1.455914433  | 9.35E-18    | 2.90E-15   |
| JAM3     | -1.038215349 | 0.006402469 | 0.01030102 |
| AHR      | 1.027721779  | 6.97E-11    | 7.97E-10   |
| PMAIP1   | 1.261742148  | 2.63E-07    | 1.18E-06   |
| VLDLR    | -1.010366476 | 2.97E-05    | 8.13E-05   |
| MIR23B   | -2.074149794 | 0.003376817 | 0.00577848 |
| CDK6     | 2.155335299  | 2.60E-13    | 5.88E-12   |
| PIK3AP1  | 1.689007552  | 1.23E-11    | 1.72E-10   |
| CASP8    | 1.025188777  | 1.23E-12    | 2.27E-11   |

|          |              |             |            |
|----------|--------------|-------------|------------|
| IRAK2    | 1.211470698  | 2.83E-07    | 1.27E-06   |
| CD46     | 1.026641015  | 3.21E-13    | 7.04E-12   |
| CEBPD    | -1.016087921 | 2.38E-05    | 6.68E-05   |
| MMP7     | 3.717400618  | 8.87E-09    | 5.78E-08   |
| C4A      | 1.283184665  | 0.000215427 | 0.00048149 |
| LGALS2   | 1.762069418  | 0.017073005 | 0.02498264 |
| KAT2B    | -1.209087786 | 3.95E-13    | 8.42E-12   |
| CD36     | -1.707240351 | 5.07E-09    | 3.49E-08   |
| BCL2A1   | 1.059604045  | 3.19E-06    | 1.10E-05   |
| TRAIP    | 1.563277895  | 6.02E-14    | 1.66E-12   |
| TNIP3    | 1.349818969  | 1.91E-05    | 5.50E-05   |
| CAV1     | -1.17518645  | 0.000107763 | 0.00025814 |
| CD274    | 1.696068043  | 0.000294194 | 0.00063775 |
| CARD9    | 1.074734736  | 1.76E-05    | 5.10E-05   |
| FCGR2A   | 1.582316994  | 9.14E-10    | 7.74E-09   |
| TRAF5    | 1.104375673  | 2.15E-08    | 1.27E-07   |
| C4BPB    | 1.729163023  | 1.85E-05    | 5.33E-05   |
| C4BPA    | 5.217518212  | 2.32E-11    | 3.03E-10   |
| TRIB3    | 2.475762576  | 1.66E-10    | 1.73E-09   |
| SIGLEC11 | -2.32067657  | 0.000154351 | 0.00035715 |
| SIGLEC9  | 1.084904756  | 5.14E-05    | 0.00013279 |
| SIGLEC7  | 1.15037577   | 5.31E-05    | 0.00013681 |
| RGMB     | -1.094444711 | 7.64E-08    | 3.93E-07   |
| OAS2     | 1.361470833  | 1.47E-07    | 7.03E-07   |
| CFB      | 1.06363506   | 0.003206988 | 0.00551764 |
| ADAM10   | 1.156024517  | 1.40E-15    | 7.59E-14   |
| KLK1     | 1.34521997   | 0.021326317 | 0.03055365 |
| EGR1     | -1.534420579 | 0.005848265 | 0.00949016 |
| F2RL2    | 2.055547913  | 7.98E-11    | 8.99E-10   |
| HOXA9    | 3.674605389  | 3.05E-11    | 3.84E-10   |
| HMGB3    | 2.048871178  | 1.24E-16    | 1.25E-14   |
| PLK1     | 1.866532638  | 4.57E-14    | 1.32E-12   |
| WDR62    | 2.346803679  | 1.63E-16    | 1.50E-14   |
| YJEFN3   | 1.28676239   | 1.24E-07    | 6.03E-07   |
| FCGR1A   | 2.449499591  | 1.12E-13    | 2.82E-12   |
| UBD      | 2.940480374  | 3.89E-10    | 3.65E-09   |
| CD300E   | 1.352597318  | 0.025946596 | 0.03643053 |
| RAD21    | 1.093261423  | 4.75E-15    | 2.01E-13   |
| TPSB2    | -1.020224694 | 6.31E-05    | 0.00015962 |
| IFI6     | 1.739378694  | 5.07E-08    | 2.72E-07   |
| GLI1     | 1.152098299  | 0.001494549 | 0.00276301 |

|        |              |          |          |
|--------|--------------|----------|----------|
| SPON2  | 1.332394048  | 5.16E-09 | 3.54E-08 |
| C7     | -1.428345214 | 6.90E-09 | 4.60E-08 |
| SLAMF8 | 1.5730481    | 1.97E-08 | 1.17E-07 |
| SLAMF9 | 1.690136852  | 1.87E-05 | 5.40E-05 |

---
